1 **Molecular and genetic regulation of pig pancreatic islet cell development**

2  
3

4 Seokho Kim<sup>1,9</sup>, Robert L. Whitener<sup>1,9</sup>, Heshan Peiris<sup>1</sup>, Xueying Gu<sup>1</sup>, Charles A. Chang<sup>1</sup>,  
5 Jonathan Y. Lam<sup>1</sup>, Joan Camunas-Soler<sup>2</sup>, Insung Park<sup>3</sup>, Romina J. Bevacqua<sup>1</sup>, Krissie Tellez<sup>1</sup>,  
6 Stephen R. Quake<sup>2,4</sup>, Jonathan R. T. Lakey<sup>5</sup>, Rita Bottino<sup>6</sup>, Pablo J. Ross<sup>3</sup>, Seung K. Kim<sup>1,7,8</sup>

7  
8  
9

<sup>1</sup>Department of Developmental Biology, Stanford University School of Medicine,  
Stanford, CA, 94305 USA

10 <sup>2</sup>Department of Bioengineering, Stanford University, Stanford, CA, 94305 USA

11 <sup>3</sup>Department of Animal Science, University of California Davis, Davis, CA, 95616 USA

12 <sup>4</sup>Chan Zuckerberg Biohub, San Francisco, CA 94518, USA.

13 <sup>5</sup>Department of Surgery, University of California at Irvine, Irvine, CA, 92868 USA

14 <sup>6</sup>Institute of Cellular Therapeutics, Allegheny Health Network, Pittsburgh, PA, 15212 USA

15 <sup>7</sup>Department of Medicine, Stanford University School of Medicine, Stanford, CA, 94305 USA

16 <sup>8</sup>Stanford Diabetes Research Center, Stanford University School of Medicine,  
17 Stanford, CA, 94305 USA

18

19 <sup>9</sup>These authors contributed equally

20

21 Correspondence and requests for materials should be addressed to S.K.K (email:  
22 [seungkim@stanford.edu](mailto:seungkim@stanford.edu))

23

24 **Key Words:** pancreas; metabolism; organogenesis;  $\beta$ -cell;  $\alpha$ -cell;  $\delta$ -cell; diabetes mellitus

25

26 **Summary Statement:** This study reveals transcriptional, signaling and cellular programs  
27 governing pig pancreatic islet development, including striking similarities to human islet  
28 ontogeny, providing a novel resource for advancing human islet replacement strategies.

29 **Abstract**

30 Reliance on rodents for understanding pancreatic genetics, development and islet function  
31 could limit progress in developing interventions for human diseases like diabetes mellitus.  
32 Similarities of pancreas morphology and function suggest that porcine and human pancreas  
33 developmental biology may have useful homologies. However, little is known about pig  
34 pancreas development. To fill this knowledge gap, we investigated fetal and neonatal pig  
35 pancreas at multiple, crucial developmental stages using modern experimental approaches.  
36 Purification of islet  $\beta$ -,  $\alpha$ - and  $\delta$ -cells followed by transcriptome analysis (RNA-Seq) and  
37 immunohistology identified cell- and stage-specific regulation, and revealed that pig and human  
38 islet cells share characteristic features not observed in mice. Morphometric analysis also  
39 revealed endocrine cell allocation and architectural similarities between pig and human islets.  
40 Our analysis unveiled scores of signaling pathways linked to native islet  $\beta$ -cell functional  
41 maturation, including evidence of fetal  $\alpha$ -cell GLP-1 production and signaling to  $\beta$ -cells. Thus,  
42 the findings and resources detailed here show how pig pancreatic islet studies complement  
43 other systems for understanding the developmental programs that generate functional islet cells,  
44 and that are relevant to human pancreatic diseases.

45

## 46 **Introduction**

47 Progress from studies of pancreas biology in humans (Hart and Powers, 2019; Hrvatin et al.,  
48 2014b) has advanced our understanding of post-natal islet regulation and function. The  
49 recognition that mouse pancreas biology – while essential – has limitations for understanding  
50 human pancreas formation or diseases (Hattersley and Patel, 2017; Maestro et al., 2007), has  
51 intensified interest in experimental systems that more closely reflect human pancreas  
52 development (McKnight et al., 2010; Pan and Brissova, 2014). There is a specific, crucial  
53 knowledge gap in our understanding of human islet and pancreas development from mid-  
54 gestation through neonatal and juvenile stages, a period when critical aspects of islet  
55 development are known to occur (Arda et al., 2016). The use of human primary tissues to  
56 address such questions is limited by inter-individual heterogeneity, unpredictable and restricted  
57 access to tissue from key developmental stages, and challenges implementing high-throughput  
58 molecular approaches. Likewise, reconstitution of islet development from stem cell sources or  
59 fetal human cell lines remains imperfect (Sneddon et al., 2018), thereby limiting interpretation of  
60 developmental studies in those systems.

61 Humans and pigs are omnivorous mammals with similar physiology and metabolic diseases,  
62 including diabetes mellitus and its complications, from diet-induced obesity, insulinopathy and  $\beta$ -  
63 cell stress (Dyson et al., 2006; Lim et al., 2018; Renner et al., 2013). Recent experimental  
64 advances expand possible studies of pig pancreas development to include gain- and loss-of-  
65 function genetics (Kemter et al., 2017; Matsunari et al., 2013; Sheets et al., 2018; Wu et al.,  
66 2017), fetal surgery and immunomodulation (Fisher et al., 2013), and primary islet cell genetics  
67 (Peiris et al., 2018). Prior studies of pig pancreas development have largely relied on  
68 immunohistological survey of tissue cell types (Carlsson et al., 2010; Ferrer et al., 2008;  
69 Hassouna et al., 2018; Nagaya et al., 2019). Moreover, studies linking hallmark islet functions,  
70 like regulated insulin secretion and dynamic changes in gene expression at advancing  
71 developmental stages, have not been previously reported (Mueller et al., 2013). Thus, pancreas  
72 and metabolic research could benefit from systematic application of powerful methods like cell  
73 purification by flow cytometry, high-throughput transcriptome analysis, and islet physiological  
74 studies across a comprehensive range of pig developmental stages.

75 Here we apply these and other modern approaches to delineate pig pancreas development,  
76 with a focus on islet  $\beta$ -cells, the sole source of insulin, and  $\alpha$ -cells, the principal systemic source  
77 of the hormone glucagon. Dysregulation of hormone secretion by these cells is thought to be a  
78 leading cause of both type 1 diabetes (T1D) and type 2 diabetes (T2D) in humans (Holst et al.,  
79 2017; Lee et al., 2016). Our findings provide evidence of greater similarity between pig and

80 human  $\beta$ -cells and  $\alpha$ -cells than to cognate mouse cells, and demonstrate how studies of pig  
81 pancreatic cells can advance our understanding of the genetic, molecular, signaling and  
82 physiological programs that generate functional pancreatic islet cells.

83

## 84 **Results**

### 85 **Pancreas dissociation and FACS purification of islet cells from fetal and neonatal pigs**

86 To measure gene expression and functional changes in the developing pig pancreas, we  
87 established a reliable infrastructure to procure pancreata from fetal or neonatal pigs using  
88 rigorous criteria that optimized tissue quality and gene expression analysis (Fig. 1A). To  
89 investigate the crucial period of ontogeny culminating in functional islet cells, we systematically  
90 isolated pancreata from gestational days (d) 40, 70, 90 and post-natal days (P) 8 and 22 (Fig.  
91 1A). We surveyed sorting methods based on cell surface epitopes, like in prior work with mouse  
92 and human cells (Arda et al., 2016; Arda et al., 2018; Sugiyama et al., 2013), but have not yet  
93 achieved reliable cell fractionation based with this strategy (R. Whitener and S. K. Kim, unpubl.  
94 results). Instead, we used intracellular sorting with specific antibodies against insulin-, glucagon-  
95 and somatostatin- to isolate  $\beta$ -,  $\alpha$ - and  $\delta$ -cells, respectively, from fetal or neonatal pancreata  
96 (Fig. S1A), like in prior work on human islets (Arda et al., 2016; Hrvatin et al., 2014a; Peiris et  
97 al., 2018). Quantitative RT-PCR (qRT-PCR: Fig. 1B) confirmed enrichment or depletion of  
98 expected marker genes for  $\beta$ - (*INS*),  $\alpha$ - (*GCG*),  $\delta$ - (*SST*), ductal (*KRT19*) and acinar cells  
99 (*AMY2*).

100 To obtain comprehensive gene expression profiles, we performed RNA-Seq on 37 libraries  
101 generated from fetal and neonatal pancreatic cells (Table S1). An average of 7 million reads per  
102 sample library uniquely mapped to a current pig reference transcriptome (Sscrofa11.1).  
103 Unsupervised hierarchical clustering of transcriptome data with Pearson correlation analysis  
104 revealed distinct expression profiles that changed with advancing developmental stage within  
105 specific cell types (Fig. S1B). Principal component analysis with these samples showed that  
106 transcriptomes clustered in the first principal component according to cell type ( $\beta$ -,  $\alpha$ - or  $\delta$ -cells:  
107 PC1, 35% of variance), and according to advancing developmental stage in the second principal  
108 component (PC2, 25% of variance: Fig. S1C). Samples from 'late fetal' stages d70 and d90  
109 clustered closely and separately from d40 samples, and were grouped together for subsequent  
110 analysis (pig development *in utero* averages 114 days). In summary, our cell purification  
111 strategy generated high-quality gene expression profiles of developing pig  $\beta$ -,  $\alpha$ - and  $\delta$ -cells.

112

113 **High-depth transcriptome maps in pig  $\beta$ -,  $\alpha$ - and  $\delta$ -cells.**

114 To evaluate stage-specific differential gene expression, we analyzed transcriptome data in  
115 early fetal (d40), late fetal (d70 and d90) and neonatal stages (P8-P22) (Fig. 1C-H). We used  
116 the DESeq2 algorithm (Love et al., 2014) to find differentially expressed genes (DEGs)  
117 encoding transcripts whose level changed at least 1.5-fold (adjusted  $P < 0.05$ ) between these  
118 stages in  $\beta$ -,  $\alpha$ - or  $\delta$ -cells. Between early and late fetal stages, we identified 2696 DEGs in  $\beta$ -  
119 cells, with transcripts from 1270 genes increased and 1426 decreased. Between late fetal and  
120 neonatal stages, we identified 1463 DEGs: transcripts from 785 genes increased, and 678  
121 genes decreased (Fig. 1C and Table S2). In  $\alpha$ -cells between early and late fetal stages, we  
122 identified 2823 DEGs with transcripts from 1311 genes increased and 1512 genes decreased.  
123 Between late fetal and neonatal stages, we identified 2291 DEGs: transcripts from 1200 genes  
124 increased, and 1091 genes decreased (Fig. 1E and Table S2). In  $\delta$ -cells between late fetal and  
125 neonatal stages, we identified 1698 DEGs with transcripts from 985 genes increased, and 713  
126 genes decreased (Fig. 1G and Table S2). Among DEGs, we observed subsets of genes  
127 enriched in either fetal or neonatal stages in  $\beta$ -,  $\alpha$ - or  $\delta$ -cells, confirming the presence of  
128 regulated developmental gene expression programs in specific pig islet cell types. Transcript  
129 abundance data from  $\beta$ -,  $\alpha$ - and  $\delta$ -cells are also provided in a searchable dataset (Table S3).

130 To evaluate coherent patterns of differential gene expression, and effects on signaling  
131 pathways at specific stages, we performed gene ontology (GO) term analysis for biological  
132 processes with Clusterprofiler (Yu et al., 2012). In the transition from the early to the late fetal  
133 stages, we observed enrichment of specific terms linked to islet  $\beta$ - or  $\alpha$ -cell development, like  
134 glucose homeostasis, endocrine pancreas development, store-operated calcium entry,  
135 response to glucose, and regulation of hormone secretion (Fig. 1D,F). In the transition from late  
136 fetal and neonatal stages in  $\beta$ -,  $\alpha$ - or  $\delta$ -cells, we observed enrichment of biological processes  
137 distinct from those at earlier developmental stages. These included MAP kinase signaling,  
138 hormone secretion, cAMP metabolic process, and Rho protein signaling transduction (Fig.  
139 1D,F,H).

140

### 141 **Cell type- and stage-specific gene expression in pig islet $\beta$ -, $\alpha$ - and $\delta$ -cells**

142 Next, we assessed expression of genes thought to regulate development of  $\beta$ -,  $\alpha$ - and  $\delta$ -cells  
143 (Fig. 2A-H). Since transcription factors, including PDX1, NKX6.1 and ARX, are known to govern  
144  $\beta$ - and  $\alpha$ -cell differentiation in mouse and human islet cells (Aguayo-Mazzucato et al., 2011;  
145 Artner et al., 2007; Artner et al., 2010; Collombat et al., 2003; Schaffer et al., 2013), we  
146 assessed expression of transcription factors in pigs. Transcripts encoding the factors PDX1,

147 MAFA and NKX6.1 were highly enriched in pig  $\beta$ -cells throughout development, while genes  
148 encoding ARX and IRX2 were exclusively expressed in pig  $\alpha$ -cells (Fig. 2A, B). Unlike in mice,  
149 MAFB is known to be expressed in both human  $\beta$ - and  $\alpha$ -cells (Arda et al., 2016; Blodgett et al.,  
150 2015). Notably, we observed that *MAFB* was expressed in both pig  $\beta$ - and  $\alpha$ -cells (Fig. 2A). As  
151 expected, pig  $\delta$ -cells expressed genes encoding transcription factors such as *HHEX*, *PDX1*, and  
152 the transporter *RBP4*, consistent with previous findings in other systems (Muraro et al., 2016)  
153 (Fig. 2A,C). GLP1R is known to be highly expressed in human  $\beta$ -cells and involved in  $\beta$ -cell  
154 function (Dai et al., 2017). Similar to human, *GLP1R* mRNA was highly expressed in pig  $\beta$ -cells  
155 (Fig. 2D). Urocortin3 (*UCN3*) secreted by  $\beta$ -cells binds to corticotropin-releasing hormone  
156 receptor 2 (*CRHR2*) in  $\delta$ -cells, stimulating somatostatin secretion (van der Meulen et al., 2015).  
157 In accordance with these previous findings, we observed that *UCN3* and *CRHR2* mRNA are  
158 highly expressed in pig  $\beta$ -cells and  $\delta$ -cells, respectively, raising the possibility that this signaling  
159 axis is conserved in the pig (Fig. 2D).

160 We also observed dynamic expression of genes regulating islet cell proliferation and function  
161 in developing pig  $\beta$ - and  $\alpha$ -cells (Fig. 2E-H). For example, *MKI67*, *BUB1B* and *NUSAP1*, which  
162 encode products known to regulate mitosis and cell cycle progression, declined as  $\beta$ - and  $\alpha$ -cell  
163 development advanced (Fig. 2E). To validate these findings, we used immunohistology to  
164 quantify the nuclear factor Ki67, a marker of cell proliferation encoded by *MKI67* in multiple  
165 species, including pigs, humans and mice (Arda et al., 2016; Georgia and Bhushan, 2004; Meier  
166 et al., 2008; Teta et al., 2007). In pigs, pancreas immunostaining revealed a high percentage  
167 (10%) of Ki67<sup>+</sup> early fetal islet cells (d40), that declined to 2% by late fetal and neonatal stages,  
168 then further declined to <0.1% by adulthood (Fig. 2F and Fig. S2). These changes were  
169 mirrored by mRNA levels encoding *MKI67* (Fig. 2E). Thus, we observed evidence of vigorous  
170 fetal-stage proliferation of islet cells that, like in mice and humans, declined further after birth.

171 Likewise, we found that expression of 'disallowed' genes like *COX5A*, *SLC16A1*, *MGST3*  
172 and *LDHA*, originally identified in  $\beta$ -cells and thought to restrain  $\beta$ -cell function and maturation  
173 (Lemaire et al., 2016; Pullen et al., 2017; Pullen et al., 2010; Sekine et al., 1994), declined  
174 during development (Fig. 2G). We also detected dynamic or cell type-specific expression of  
175 genes encoding established effectors of islet hormone secretion, like the proprotein convertase  
176 *PCSK2*, the ion transporter *SLC30A8*, and the glucose transporter *SLC2A2* (Fig. 2H). These  
177 data delineate gene expression changes at genome-scale that orchestrate age-dependent  
178 changes in proliferation and maturation of islet  $\beta$ -,  $\alpha$ - and  $\delta$ -cells. Thus, our studies revealed

179 both similarities of (1) *cell type-specific* gene expression between pig and human islet  $\beta$ -,  $\alpha$ - and  
180  $\delta$ -cells, and (2) conserved *stage-specific* gene expression dynamics in pigs.

181

### 182 **Stage-specific islet cell allocation and production of transcription factors**

183 To verify further our RNA-Seq findings in developing islets, we performed immunostaining of  
184 pig pancreata at specific developmental stages. At fetal stages, islet  $\beta$ -,  $\alpha$ - and  $\delta$ -cells formed  
185 small clusters, which enlarged subsequently in neonatal and adult pancreas (Fig. 3A-C and Fig.  
186 S3A). Thus, like in other species (Carlsson et al., 2010; Jeon et al., 2009; Jorgensen et al.,  
187 2007), islet cells formed clusters at the inception of their ontogeny, then continued their  
188 morphogenesis in multicellular structures through post-natal stages. In fetal, neonatal and adult  
189 islets, standard morphometry revealed that differentiation of islet cells into specific lineages was  
190 dynamic (Fig. S3A,B). In early fetal pancreas, the number of  $\alpha$ -cells is slightly higher than that of  
191  $\beta$ -cells, while the  $\delta$ -cell fraction was very low (<4%). However, from late fetal to neonatal stages,  
192 the number of  $\beta$ -cells is higher than that of  $\alpha$ -cells, while the number of  $\delta$ -cells is similar to that  
193 of  $\alpha$ -cells (Fig. S3B). Consistent with our RNA-Seq data, antibodies that detect the transcription  
194 factors (TFs) PDX1, NKX6.1 and MAFB showed restricted production in specific islet cell  
195 subsets. In  $\beta$ -cells, we detected nuclear PDX1, NKX6.1. By contrast, we detected MAFB protein  
196 in both  $\beta$ - and  $\alpha$ -cells (Fig. 3D-F). Unlike in mice, human  $\beta$ -cells express the transcription factors  
197 SIX3 and SIX2 in an age-dependent manner; moreover human  $\alpha$ -cells do not express SIX3 or  
198 SIX2 (Arda et al., 2016). Immunohistology (Fig. 3G) demonstrated SIX3 production specifically  
199 in a subset of adult  $\beta$ -cells, and qRT-PCR (Fig. 3H) of pig islets revealed adult-specific  
200 production of SIX3. We observed a similar age-dependent expression of SIX2 (Fig. 3I); the  
201 absence of antibodies for pig SIX2 precluded immunohistology studies. In summary, stage-  
202 specific and cell-specific expression of multiple TFs in pig islets resembled that observed  
203 previously in human islet cell subsets.

204

### 205 **Similarities of pig and human $\beta$ -cells and $\alpha$ -cells**

206 Beyond assessment of TFs, we sought independent evidence of similarities between pig,  
207 human and mouse  $\beta$ -cells. We used unsupervised hierarchical clustering with distance matrix  
208 analysis of our RNA-Seq data, and extant human and mouse islet cell bulk RNA-Seq data (Arda  
209 et al., 2016; Blodgett et al., 2015; Qiu et al., 2017). This analysis suggested that neonatal  $\beta$ -cell  
210 transcriptomes in pig and human were globally more similar than to the  $\beta$ -cell transcriptome of

211 mice (Fig. 4A). The absence of sufficient fetal or neonatal mouse  $\alpha$ - or  $\delta$ -cell transcriptome data  
212 precluded analogous global comparisons of human, pig and mouse  $\alpha$ -cells or  $\delta$ -cells. GO term  
213 enrichment analysis also revealed differential molecular signatures between neonatal pig and  
214 juvenile human  $\beta$ -cells. Significantly enriched pig pathways were associated with proliferation,  
215 while pathways enriched in human juvenile islet  $\beta$ -cells included those regulating  $\beta$ -cell  
216 secretory function (Fig S4 and Table S5). This is consistent with prior observations, including  
217 relatively higher proliferation in neonatal pig  $\beta$ -cells compared to juvenile human  $\beta$ -cells (Arda et  
218 al., 2016).

219 Next, we performed pairwise comparison of pig and human (Blodgett et al., 2015) cells from  
220 fetal and postnatal stages (Fig. 4B-G and Table S4). This analysis revealed conserved cell type-  
221 specific and stage-specific regulation of multiple factors. For example, *GLP1R* encodes a G  
222 protein-coupled receptor for the incretin hormone GLP-1. Like in humans (Dai et al., 2017),  
223 *GLP1R* is expressed in pig  $\beta$ -cells but not  $\alpha$ -cells and this expression increases from fetal to  
224 neonatal stages (Fig. 4B). By contrast the G protein coupled receptor encoded by *GPR87* is  
225 expressed in pig and human  $\alpha$ -cells but not  $\beta$ -cells and has increasing expression during  
226 postnatal islet maturation (Fig. 4C). Similarities in cell type-specificity or stage-specific  
227 expression for other regulators, including *DNMT1*, *PPID*, *KLF9*, and *DCHS1*, provide further  
228 evidence of conserved genetic programs underlying pig and human  $\beta$ - and  $\alpha$ -cell development  
229 (Fig. 4D-G). Taken together, our analysis of specific islet TF's, global gene expression  
230 similarities in  $\beta$ -cells, similarities of developmental islet cell allocation, and of islet morphology  
231 provide evidence of remarkable similarities in pig and human  $\beta$ -cell development.

232

### 233 **Dynamic gene regulation during pig $\beta$ - and $\alpha$ -cell development**

234 Our studies of pig islet development provided an unprecedented opportunity to assess gene  
235 expression dynamics throughout fetal and postnatal stages. From the early fetal to neonatal  
236 stage, we identified 3,111 genes in  $\beta$ -cells and 3,668 genes in  $\alpha$ -cells with dynamic expression  
237 (Fig. 5A,B and Table S6). Thus, our analysis permitted grouping of genes in 'clusters', based on  
238 the sequence of changes observed between three discrete developmental periods. For example,  
239 we observed genes in  $\beta$ - and  $\alpha$ -cells that increased through late fetal stages, then did not  
240 change thereafter (cluster 2, 'Up\_NC') and other genes whose transcript levels declined through  
241 late fetal stages then did not change thereafter (cluster 7, 'Down\_NC') (Table S6). We grouped  
242 genes in 8 clusters (Up\_Down, Down\_Up, etc.), and GO term analysis of each cluster revealed  
243 dynamic biological processes (Fig. 5A,B and Fig. S5A,B). For example, we observed that the  $\beta$ -



244 and  $\alpha$ -cell “Down\_NC” clusters were significantly enriched for genes that regulate cell  
245 proliferation and cell cycle progression (like *CDK2*, *CDK14* and *CDC20*; Fig. 5A,B and Table  
246 S6). The “Up\_NC” cluster in both cell types was enriched for genes associated with multiple  
247 signaling pathways involved in glucose and steroid hormone signaling (Fig. S5A,B). Thus, the  
248 data identified multiple biological processes involved in islet differentiation and maturation that  
249 are dynamically regulated in development.

250 The frequency of transcript measurement in our workflow also identified unanticipated gene  
251 expression dynamics in developing  $\beta$ - and  $\alpha$ -cells, particularly in gene clusters with “Up\_Down”  
252 or “Down\_Up” trajectories (clusters 3 and 6: Fig. 5C,D). For example, from fetal to neonatal  
253 stages in islet  $\beta$ -cells, we observed increased levels of transcript encoding pyruvate  
254 dehydrogenase kinase 4 (*PDK4*), a factor previously characterized (Pullen et al., 2017) as  
255 ‘disallowed’ in  $\beta$ -cells (Fig. 5C). Consistent with this, we observed that expression of  
256 *PPARGC1A*, a known positive regulator of *PDK4* transcription (Wende et al., 2005) also  
257 increased at this stage in  $\beta$ -cell development (“NC\_Up” cluster; Table S6). Thus, unlike other  
258 disallowed genes whose expression continuously declined in developing  $\beta$ - and  $\alpha$ -cells, *PDK4*  
259 expression appeared to increase after late fetal stages, raising the possibility of as-yet  
260 unidentified functions for *PDK4* in pig  $\beta$ -cell development.

261 In human diabetes, genetic risk may reflect monogenic or polygenic mechanisms  
262 (Cerolsaletti et al., 2019; Hattersley and Patel, 2017; Pearson, 2019; Sanyoura et al., 2018). We  
263 hypothesized that causal genes in monogenic forms of diabetes including neonatal diabetes  
264 mellitus (NDM) and maturity onset diabetes of the young (MODY) might be developmentally  
265 regulated. Thus, we compared expression dynamics of 33 genes, linked by prior studies to  
266 human NDM and MODY (Velayos et al., 2017; Yang and Chan, 2016), and with known pig  
267 orthologues (Table S7). We found ten genes dynamically expressed between fetal and neonatal  
268 stages in pig  $\beta$ -cells. Of those, six genes - *INS*, *STAT3*, *NEUROG3*, *GATA4*, *SLC2A2*, and  
269 *PCBD1* - are known to have dynamic expression in human  $\beta$ -cells. In pig  $\alpha$ -cells, 13 causal  
270 genes are dynamically expressed, with four - *WFS1*, *NEUROG3*, *CEL*, and *GATA6* - known to  
271 have changing expression in human  $\alpha$ -cells. We also identified seven genes which are  
272 differentially expressed between the late fetal and neonatal stages in pig  $\delta$ -cells. Thus our work  
273 reveals pig orthologues of causal genes for MODY and NDM whose expression changes in  
274 development of multiple islet cell types, identifying opportunities for investigating native dynamic  
275 regulation of these genes.

276 *PCSK1* encodes an endopeptidase normally expressed in intestinal L-cells to regulate GLP-1  
277 production (Rouille et al., 1995; Steiner, 1998), and in  $\beta$ -cells for proinsulin processing.  
278 Unexpectedly, we observed a transient increase of *PCSK1* mRNA in fetal  $\alpha$ -cells (Fig. 5E);  
279 immunostaining confirmed that PCSK1 protein was produced in a subset of late fetal d70  $\alpha$ -cells  
280 but not in early fetal or adult  $\alpha$ -cells (Fig. 5F). Consistent with these findings, ELISA  
281 quantification of bioactive GLP-1 revealed abundant production in d70 islets that decreased  
282 thereafter and was undetectable in adult islets (Fig. 5G). Likewise, *DPP4* encodes a protease  
283 that inactivates GLP-1 and whose expression is extinguished in postnatal human  $\beta$ -cells (Arda  
284 et al., 2016; Blodgett et al., 2015). However, we observed a significant *increase* of *DPP4* mRNA  
285 and protein levels in  $\beta$ -cells at late fetal stages, when  $\beta$ -cells also express *GLP1R* (Fig. 5H,I and  
286 Table S3). Together, these findings provide evidence that fetal  $\alpha$ -cells transiently produce GLP-  
287 1, and that GLP-1/GLP1R/DPP4 signaling interactions could regulate fetal  $\beta$ -cell development.

288

### 289 **Genetic regulation of $\beta$ -cell functional maturation**

290 Age-dependent enhancement of glucose-regulated insulin secretion has been described in  
291 rodents and humans (Aguayo-Mazzucato et al., 2011; Arda et al., 2016; Avrahami et al., 2015;  
292 Blum et al., 2012; Rorsman et al., 1989). In pigs, prior studies of islet insulin secretion have  
293 focused on postnatal stages (Mueller et al., 2013), but did not compare fetal to neonatal stages.  
294 We compared glucose-stimulated insulin secretion in islets isolated from late fetal (d70) or  
295 weaning-age donors (P22). Glucose or IBMX, a potentiator of intracellular cAMP levels and  
296 insulin secretion, did not significantly increase insulin output by fetal islets in static batch  
297 cultures (Fig. 6A). Moreover, insulin secretion by fetal islets in the 'basal' 2.8 mM glucose  
298 condition was higher than that observed from P22 islets (Fig. 6A). In P22 pig islets, glucose or  
299 glucose + IBMX significantly increased insulin secretion (Fig. 6A), though to a lesser degree  
300 than in human juvenile islets (Arda et al 2016). The pattern of declining basal secretion  
301 accompanied by enhanced glucose-regulated insulin secretion in pig islets is similar to findings  
302 from prior studies of isolated late-fetal and neonatal rodent islets (Sodoyez-Goffaux et al., 1979),  
303 and provides evidence of post-natal pig  $\beta$ -cell functional maturation.

304 To assess the genetic basis of this maturation, we compared transcriptomes from late fetal  
305 and P22  $\beta$ -cells (Fig. 6B). DESeq2 analysis revealed significantly increased expression of 924  
306 genes and decreased expression of 895 genes between late fetal (both E70 and E90) and P22  
307 (Table S8). GO term analysis revealed that up-regulated transcripts were encoded by genes  
308 associated with pathways involved in insulin secretion (Fig. 6C and Table S9). Intracellular

309 cAMP and Ca<sup>2+</sup> levels are crucial regulators of insulin exocytosis (Tengholm and Gylfe, 2017).  
310 We observed that transcripts of genes encoding channels activated by cAMP, such as HCN4  
311 and KCNQ1 were up-regulated (Fig. 6D). We also found increased expression of genes  
312 regulating cytoplasmic Ca<sup>2+</sup> concentration or genes involved in Ca<sup>2+</sup>-mediated signaling  
313 pathways such as CRACR2A and CAMK2D (Fig. 6D). Phosphodiesterases (PDEs), which  
314 induce hydrolysis of cAMP to 5'-AMP, were also up-regulated by stage P22 (Fig. 6C). These  
315 findings are consistent with the view that cAMP signaling 'tone' may be relatively high in fetal  
316 islets, then reduced in the post-natal pig  $\beta$ -cell, a view supported by our quantification of  
317 dynamic basal and glucose + IBMX regulation of insulin secretion at these stages (Fig. 6A).

318 Consistent with our observation that insulin secretion at basal glucose levels declined during  
319 fetal to postnatal islet development, we observed that pathways involved in glucose processing  
320 such as "glucose catabolic process", "ATP generation from ADP" and "calcium ion regulated  
321 exocytosis" were down-regulated in  $\beta$ -cells (Fig. 6E). Compared to a relative peak in late fetal  
322 development, transcripts of genes regulating glycolysis such as *ENO2*, *ALDOB*, *GPD1* and  
323 *GCK* were down regulated by stage P22 (Fig. 6F). Thus, our data suggests that multiple inter-  
324 related signaling pathways regulating insulin exocytosis continue to mature through weaning-  
325 age (P22). In summary, our combined developmental, functional and molecular investigations  
326 here revealed molecular and genetic factors governing maturation of neonatal  $\beta$ -cells and  
327 unveiled conserved mechanisms underlying islet cell development and function in pigs and  
328 humans.

329

## 330 **Discussion**

331 Based on the crucial role of pancreatic islets in human diseases and the expanding catalog of  
332 differences between human and mouse islet developmental biology or regulation (Arda et al.,  
333 2013; Arda et al., 2016; Brissova et al., 2005; Hart and Powers, 2019), there is intense interest in  
334 developing complementary experimental systems for investigating islet development and  
335 maturation. To address this need, we used an integrated approach to delineate pancreas  
336 development in pigs. This multimodal assessment of genetic and developmental phenotypes  
337 across a comprehensive range of fetal and post-natal stages of pig pancreas ontogeny and  
338 maturation revealed multiple similarities in formation and regulation of pig and human islet  $\beta$ -,  $\alpha$ -  
339 and  $\delta$ -cells, including features not observed in mice. Systematic phenotyping of pig pancreas  
340 development - particularly gene expression and identification of developmental signaling  
341 pathways - revealed unexpected dynamic gene regulation, and evidence of native intra-islet  
342 GLP-1 signaling. Moreover, studies in pigs are cost-efficient (see Methods). Our experimental

343 approaches and findings provide a unique roadmap for diabetes and metabolic research,  
344 including attempts to direct differentiation and maturation of replacement islet cell types from  
345 renewable human cell sources.

346 Here, we established cell purification strategies based on flow cytometry to investigate  
347 developmental genetics in fetal and neonatal pig  $\beta$ -,  $\alpha$ - and  $\delta$ -cells, an approach we and others  
348 have successfully used in pancreas from mice and humans (Arda et al., 2016; Blodgett et al.,  
349 2015; DiGrucchio et al., 2016; Hrvatin et al., 2014a; Qiu et al., 2017). Like in prior studies (Arda  
350 et al., 2016; Hrvatin et al., 2014a), we isolated primary  $\beta$ -,  $\alpha$ - and  $\delta$ -cells throughout fetal and  
351 postnatal pancreas development using antibodies against hormones specific to these cell types,  
352 an approach permitting comprehensive, high-quality stage-specific transcriptome analysis.  
353 Similar approaches for primary ductal and acinar cells should provide opportunities in the future  
354 to delineate the transcriptome of these important components of the exocrine pancreas.  
355 Moreover, discovery of flow cytometry-based methods for purifying live primary endocrine or  
356 exocrine cells, with antibodies that recognize cell-surface epitopes, should expand our capacity  
357 to investigate other important aspects of pancreatic gene regulation and function, using  
358 approaches like ATAC-Seq, promoter capture Hi-C, and Patch-Seq (Arda et al., 2018;  
359 Camunas-Soler et al., 2019; Miguel-Escalada et al., 2019).

360 Transcriptome analysis described here provides evidence of genetic regulatory mechanisms  
361 and cell development in pigs that are also conserved in other mammals, including (1) cell type-  
362 specific expression of transcription factors (*PDX1*, *MAFA*, *ARX*, *IRX*, *HHEX*) and functional  
363 regulators (*PCSK1*, *PCSK2*, *SLC2A2*, *SLC30A8*, *GLP1R*, *GCGR*), (2) transient  $\beta$ -,  $\alpha$ - and  $\delta$ -cell  
364 proliferation, peaking in fetal/perinatal stages and regulated by conserved factors like *MKI67*,  
365 *BUB1B* and *NUSAP1* (Georgia and Bhushan, 2004; Meier et al., 2008; Teta et al., 2007), (3)  
366 dynamic expression of histone or chromatin regulators like *EZH2* and *DNMT1* (Chakravarthy et  
367 al., 2017; Dai et al., 2017) and (4) reduction or elimination of transcripts encoding 'disallowed'  
368 genes (Lemaire et al., 2017; Pullen et al., 2017; Pullen et al., 2010; Thorrez et al., 2011). These  
369 findings from transcriptome analysis also correspond well with observations from our other  
370 stage-specific tissue phenotyping (see below). Stage-specific gene expression patterns  
371 revealed that pig and human  $\beta$ -cells and  $\alpha$ -cells shared characteristic molecular and  
372 developmental features not observed in mouse  $\beta$ -cells or  $\alpha$ -cells. Like in human islets (Benner  
373 et al., 2014), the transcription factor *MAFB* is expressed in both pig  $\beta$ - and  $\alpha$ -cells (Figs. 2,3).  
374 Similarly, we found that the transcription factor *SIX3* is expressed in pig  $\beta$ -cells in an age-  
375 dependent manner, like in human islets (Arda et al., 2016) (Fig. 3). Thus, studies of  
376 mechanisms governing cell type- and age-dependent expression of genes like pig *MAFB* and

377 *SIX3* could reveal the basis of  $\beta$ -cell functional maturation. Likewise, we observed features of  
378 pig fetal islets not yet noted in humans. *MAFA* expression in pig  $\beta$ -cells increased in fetal stages,  
379 and continued through postnatal stages. In humans,  $\beta$ -cell *MAFA* expression begins in fetal  
380 stages (Blodgett et al., 2015) and also increases after birth (Arda et al., 2016), but its fetal  
381 regulation remains unreported. Our studies also provide a reference transcriptome analysis of  
382 developing islet  $\delta$ -cells, whose recognized role in health and diabetes is growing (Rorsman and  
383 Huising, 2018). Together, the resources and methods described here provide evidence that  
384 developmental genetic studies of pancreas in pigs could complement similar studies in humans  
385 and mice.

386 In addition to the resemblance of pancreatic gene regulation in pigs and humans (Figs. 2,4),  
387 we observed similarities of islet morphogenesis, cell specification, regulation and islet cell  
388 allocation. Scattered islet  $\beta$ -,  $\alpha$ - and  $\delta$ -cells coalesced into small clusters at late fetal stages,  
389 which contained proliferating cells (Figs. 2,3). At birth, the proportion of  $\alpha$ - and  $\delta$ -cells in pig  
390 islets was ~50%, like that of neonatal human islets, and unlike in mice. In pig pancreas  
391 development, a large portion of fetal hormone-expressing islet cells appeared to be contained  
392 within small, dispersed clusters of varying cell composition. After birth, these clusters enlarged,  
393 and the geometry of  $\beta$ -,  $\alpha$ - and  $\delta$ -cells in islets appeared intermingled, like in human islets  
394 (Brissova et al., 2005) (Fig. 3). Studies of insulin secretion further demonstrated that  $\beta$ -cell  
395 function matures from fetal to post-natal stages like in humans (Arda et al., 2016) and other  
396 mammals. Thus, our study reveals multiple features in pig islet development that are closely  
397 conserved in human pancreas, including a subset of phenotypes not observed in rodent islets,  
398 suggesting that pigs could be a reliable surrogate animal model to study the islet function of  
399 human gene orthologs. This includes studies of dominant forms of diabetes like MODY and  
400 NDM, whose genetics have not been reconstituted in mice (Hattersley and Patel, 2017; Maestro  
401 et al., 2007). By contrast, dominant monogenic diabetes resulting from mutations in *INS* or the  
402 MODY3 gene *HNF1 $\alpha$*  has been reconstituted in pigs (Renner et al., 2013; Umeyama et al.,  
403 2009). Thus, studies of gene function and pathogenesis in diseases like MODY and NDM could  
404 be advanced through investigations in pigs.

405 Here, we evaluated pancreas phenotypes through a full range of fetal and peri-natal stages.  
406 In  $\beta$ -,  $\alpha$ - and  $\delta$ -cells, this 'granularity' of phenotyping revealed changes in >6000 genes during  
407 development, and identified developmental dynamics not previously noted in studies of human  
408 islet gene expression with comparatively limited sampling during developmental stages (Arda et  
409 al., 2016; Blodgett et al., 2015; Bramswig et al., 2013), or in one study, a single stage (Ramond

410 et al., 2018). For example, in  $\beta$ -cells, genes involved in glucose processing, including *G6PC2*  
411 and *PDK3*, are in the “Up\_NC” cluster whereas genes regulating insulin secretion, such as  
412 *SLC2A2*, are in the “NC\_Up” cluster (Table S6), indicating that mechanisms governing glucose  
413 sensing and metabolism, or insulin secretion, are established at different developmental stages  
414 in pig  $\beta$ -cells. Moreover, we noted 366  $\beta$ -cell or  $\alpha$ -cell transcripts whose levels changed with a  
415 ‘discontinuous’ trajectory in development (Fig. 5 and Table S6). That is, we observed  
416 heterogeneous patterns of expression, including early rise then fall (like *DPP4*, *FEV* in  $\beta$ -cells,  
417 and *FOXO1* or *KIT* in  $\alpha$ -cells), or initial decline followed by a later rise in transcript levels,  
418 including those encoding a subset of disallowed gene products like *PDK4* in  $\beta$ -cells (Fig. 5 and  
419 Table S6). Thus, our ability to detect dynamic gene expression trajectories in  $\beta$ -cell or  $\alpha$ -cells  
420 was enhanced by the comprehensiveness of developmental phenotyping afforded in pigs.

421 Cell- and stage-specific phenotyping here also revealed links between our data to human  
422 diabetes risk and islet replacement. Prior studies have noted a significant enrichment of  
423 candidate diabetes risk genes among those with dynamic developmental expression (Arda et al.,  
424 2016; Perez-Alcantara et al., 2018). Similarly, in our recent work, prioritization of candidate  
425 diabetes risk genes with dynamic fetal or post-natal expression led to identification of *SIX2*,  
426 *SIX3* and *BCL11A* as unrecognized regulators of human  $\beta$ -cell development and function (Arda  
427 et al., 2016; Peiris et al., 2018). Here, we found significant enrichment of  $\beta$ - and  $\alpha$ -cell gene sets  
428 involved in specific developmental signaling pathways (Fig. 5). Of these, only a subset, such as  
429 mTOR, retinoic acid receptor and TGF- $\beta$  signaling, have previously been linked to  $\beta$ - and  $\alpha$ -cell  
430 biology (Blandino-Rosano et al., 2017; Brun et al., 2015; Lin et al., 2009; Yokoi et al., 2016).  
431 Thus, our datasets provide a foundation for systematic investigations of *cis*- and *trans*-  
432 regulatory elements governing the dynamic expression of diabetes risk genes in the native,  
433 physiological setting of pig islet development.

434 Identifying signals controlling islet development, including detection of signaling modulation,  
435 should enhance efforts to control and direct differentiation of functional replacement islet cells  
436 from stem cells and other renewable sources. Recent studies have explored use of neonatal pig  
437 islet cultures for identifying signals that promote  $\beta$ -cell functional maturation (Hassouna et al.,  
438 2018). In their work with stepwise directed differentiation of human stem cells into distinct  
439 lineages, Loh and colleagues have demonstrated the value of inhibiting signaling pathways –  
440 not merely through signal withdrawal, but by exposure of cells to potent signaling inhibitors – to  
441 prevent development along undesired fates or lineages (Ang et al., 2018; Loh et al., 2014). The  
442 identification of dynamically regulated genes and pathways, including those with discontinuous

443 trajectories (Up then Down, etc.), in  $\beta$ -cell and  $\alpha$ -cell development provides a new roadmap for  
444 modulating islet cell replacement efforts. Fetal and neonatal  $\beta$ -cells and  $\alpha$ -cells develop in close  
445 proximity, and our work likely identifies intercellular signaling pathways (like those regulated by  
446 *PCSK1*, *GLP1R* and *DPP4*) that could regulate differentiation of these cells. PCSK1 expression  
447 in mouse fetal  $\alpha$ -cells was reported previously (Wilson et al., 2002) but active GLP-1 production  
448 from fetal islets was not assessed; likewise, to our knowledge, human fetal islet GLP-1  
449 production has not been reported. Recent studies have demonstrated that GLP1R can be  
450 stimulated by glucagon, in addition to GLP-1 (Capozzi et al., 2019; Svendsen et al., 2018; Zhu  
451 et al., 2019); however, it remains unknown if all signaling downstream of GLP1R is activated by  
452 glucagon, or if islet cells are the sole target of GLP-1 signaling in the fetal pancreas. Further  
453 studies of endogenous GLP-1 signaling in pig fetal islet development could also clarify the  
454 emerging concept of intra-islet GLP-1 signaling in metabolically-stressed adult islets (Capozzi et  
455 al., 2019; Drucker, 2013). Thus, our findings identify multiple pathways associated with fetal and  
456 post-natal  $\beta$ -cell maturation or function (Table S9), including many not directly modulated in  
457 prior studies (Nair et al., 2019; Pagliuca et al., 2014; Rezanian et al., 2014; Russ et al., 2015). In  
458 summary, data, conceptual advances and resources detailed here provide an unprecedented  
459 molecular, cellular and developmental framework for investigating pancreas development that  
460 could inform our understanding of diabetes and obesity risk, and advance efforts to produce  
461 replacement human islets for diabetes.  
462

## 463 **Materials and methods**

### 464 **Animals and pancreas harvest**

465 Pigs used in this study were outbred and used in accordance to protocols approved by the  
466 Institutional Animal Care and Use Committees at University of California Davis and Stanford  
467 University. For collection of fetal pig pancreata, pregnancies were confirmed via ultrasound 30  
468 days after mating and pregnant gilts were humanely euthanized at 40, 70, or 90 days. The  
469 reproductive tracts were removed after mid-ventral laparotomy, cooled on ice, and fetuses were  
470 collected. Fetuses remained on ice until dissection. Pancreas was identified according to  
471 anatomical location and harvested under a stereoscopic microscope. Neonatal pancreata were  
472 harvested from neonatal piglets at 8 and 22 days of age, while adult pancreata were collected  
473 from pigs 6 months of age or older. Briefly, after euthanasia, a midline incision was performed to  
474 provide access to the peritoneum and thoracic cavity. The pancreas was rapidly chilled via  
475 either perfusion of sterile ice-cold saline solution into the descending aorta or by pouring the  
476 same solution directly into the peritoneal cavity and then surgically removed. Harvested  
477 pancreatic tissue was maintained at a temperature of 2-10°C in saline solution until further  
478 downstream processing.

479

### 480 **Generation of pancreatic single cell suspensions**

481 Morphological differences of the pancreas between developmental stages necessitated  
482 customized protocols to generate single cell suspensions suitable for downstream assays.  
483 Embryonic day 40 pancreata were diced finely with a razor blade and transferred into a 4°C  
484 solution of Collagenase D (Millipore-Sigma, Cat# C9263) at a concentration of 1 mg/ml in HBSS,  
485 and digested to single cells overnight at 4°C. Embryonic day 70 and 90 pancreata were finely  
486 diced with a razor blade and digested for 5-8 minutes at 37°C using the same Collagenase D  
487 solution above. The reaction was stopped with the addition of equal volume HBSS containing 10%  
488 porcine serum (Millipore-Sigma, Cat# P9783). If necessary, an additional digestion using  
489 TrypLE (Gibco, Cat#12605-010) for 3 minutes at 37°C was used to fully disperse any remaining  
490 cell clusters. Post-natal pancreata were digested following published methods (Lamb et al.,  
491 2014). (Logistical and technical challenges related to the mass of adult pigs precluded isolation  
492 of single cell islet suspensions of sufficient quality suitable for molecular analysis of adult pig  
493 islets.) Briefly, pancreata were trimmed to remove lymphatic, connective, and fat tissues, and  
494 chopped into 1-5 mm pieces. The tissue was digested using 2 mg/ml Collagenase D in HBSS at  
495 37°C for 12-18 minutes. 1.5 volumes of HBSS with 10% porcine serum and 0.5%  
496 Antibiotic/Antimycotic solution was added to stop digestion. Neonatal Islet Cell clusters (NICCs)



497 of the desired size were obtained after straining digest through a 500  $\mu$ m mesh (PluriSelect,  
498 Cat# 43-50500-03) to remove large undigested tissue, washed, and allowed to gravity settle two  
499 times. To generate single cell suspensions, some NICCs were further dispersed with TrypLE for  
500 3 minutes at 37°C. Remaining NICCs were spun down and resuspended in RPMI 1640 (Gibco,  
501 Cat# 11879-020) containing 5 mM glucose, 10% porcine serum, 10 mM HEPES (Caisson Labs,  
502 HOL06-6X100ML) and 1% Pen/Strep (Life Technologies, Cat# 15140-122) and placed in a  
503 humidified, 5% CO<sub>2</sub> tissue culture incubator.

504 The cost basis of pancreas procurement and islet isolation from pigs is currently lower than  
505 for humans. In 2019, reimbursement for a single human cadaveric donor pancreas is between  
506 \$4,500 and \$7,000 (US dollars). For human islets, investigators are charged \$0.12 per islet  
507 equivalent using the NIH-supported Integrated Islet Distribution Program (<https://iidp.coh.org>).  
508 By contrast, the cost of a P22 pig pancreas is approximately \$500, and after processing, a P22  
509 pancreas yields approximately 90- to 100,000 NICCs. The total cost per pig NICC is <\$0.008.

510

#### 511 **Cell flow cytometry and purification**

512 Single cell suspensions were washed twice with cold PBS and filtered with a 70  $\mu$ m filter (BD  
513 Falcon, Cat# 352350). Prior to fixation, cells were stained with LIVE/DEAD fixable Aqua  
514 (ThermoFisher, Cat# L34976) or LIVE/DEAD fixable Near-IR (ThermoFisher, Cat#L10119) dead  
515 cell stains according to manufacturer's protocol. Cells were fixed with 4% PFA in PBS (Electron  
516 Microscopy Sciences) for 10 minutes at room temperature. After fixation, cells were  
517 permeabilized with Permeabilization Buffer: 1X PBS containing permeabilization solution  
518 (BioLegend, Cat# 421002), 0.2% BSA (Sigma-Aldrich, Cat#A9576), mouse and rat IgG  
519 (Jackson Labs, Cat# 015-000-003 and 012-000-003), and 1:40 Ribolock RNase Inhibitor (Fisher  
520 Scientific, Cat# FEREO0384), for 30 minutes at 4°C. Cells were pelleted and resuspended with  
521 Wash Buffer: 1X PBS containing permeabilization solution, 0.2% BSA, and 1:100 Ribolock.  
522 Cells were pelleted again, supernatant removed, and stained with Alexa Fluor 488 labeled anti-  
523 insulin (R&D Systems, IC1417G-100UG), Alexa Fluor 647 labeled anti-glucagon (Santa Cruz,  
524 sc-57171 AF647) and PE labeled anti-somatostatin (Santa Cruz, sc-55565 PE) antibodies in  
525 Staining Buffer: 1X PBS containing permeabilization solution, 1% BSA, and 1:40 Ribolock, for  
526 30 minutes at 4°C. Cells were washed three times in Wash Buffer and resuspended in Sort  
527 Buffer: 1X PBS containing 0.5% BSA, and 1:20 Ribolock. Labeled cells were sorted on a  
528 special-order, 5-laser FACS Aria II using FACSDiva software (BD Biosciences). After excluding  
529 doublets and dead cells, desired cell populations were identified using fluorescence minus one  
530 (FMO) controls. Cells were sorted using the purity mask in chilled low retention tubes containing

531 50  $\mu$ l of Sorting Buffer. We attempted to isolate cells producing more than one islet hormone  
532 (insulin, glucagon or somatostatin) simultaneously, which have been reported in both human  
533 and pig fetal pancreas (Lukinius et al., 1992; Riopel et al., 2014). In contrast to these studies,  
534 however, the relative frequency of these cells after FACS was quite low (<0.001% of live cells)  
535 and precluded downstream analysis. Similarly, the relative paucity of  $\delta$  cells in the early fetal  
536 porcine pancreas has proven a significant hurdle to collection of sufficient numbers for  
537 downstream analysis. Post-hoc visualization of recorded data was performed using FlowJo vX  
538 software (FlowJo, LLC).

539

#### 540 **Total RNA extraction and quantitative Reverse Transcription PCR (qRT-PCR)**

541 Total RNA was extracted from the sorted cells as described (Hrvatin et al., 2014a) and  
542 concentrated using the RNA Clean & Concentrator-5 kit (Zymo Research, Cat# R1013).  
543 Complementary DNA (cDNA) was generated using the Maxima First Strand cDNA Synthesis kit  
544 (Thermo Scientific, Cat# K1642) according to the manufacturer's instructions. Purity of sorted  
545 populations was confirmed via Quantitative PCR using an Applied Biosystems 7500 Real-Time  
546 PCR System. The following TaqMan probes were used: INS (Ss03386682\_u1), GCG  
547 (Ss03384069\_u1), SST (Ss03391856\_m1), AMY2 (Ss03394345\_m1), ACTB (Ss03376081\_u1),  
548 KRT19 (Forward: 5'-GAAGAGCTGGCCTACCTG-3', Reverse: 5'-ATA  
549 CTGGCTTCTCATGTCGC-3'), SIX2 (Forward: 5'-TCAAGGAAAAGAGTCGCAGC-3', Reverse:  
550 5'-TGAACCAGTTGCTGACCTG-3') and SIX3 (Forward: 5'-ACAAGCACGAGTCGATCC-3',  
551 Reverse: 5'-CCACAAGTTCACCAAGGAGT-3'). Relative mRNA abundance was calculated by  
552 the Comparative Ct ( $\Delta\Delta$ Ct) relative quantitation method.

553

#### 554 **RNA-Seq Library preparation**

555 Multiplexed libraries were prepared using the SMARTer Stranded Total RNA-Seq Kit v2 - Pico  
556 Input Mammalian (TakaraBio, Cat# 634413) following manufacturer's instructions. Library  
557 fragments of approximately 350 bp were obtained, and the quality was assessed using a 2100  
558 Bioanalyzer (Agilent). Barcoded libraries were multiplexed and sequenced on an Illumina  
559 NextSeq sequencer.

560

#### 561 **Bioinformatic and statistical analysis of RNA-Seq datasets**

562 RNA-Seq libraries were sequenced as 75 bp pair-end reads to a depth of 30 to 60 million reads.  
563 To estimate transcriptome abundance, Salmon algorithm (v0.11.3) was used (Patro et al.,  
564 2017). An index was built on the Sus Scrofa reference transcriptome (Sscrofa 11.1, version 96)

565 (Zerbino et al., 2018) using Salmon with parameters “salmon index --keepDuplicates -t  
566 transcripts -i transcripts\_index --type quasi -k 31”. The reads were aligned to the index and  
567 quantified using Salmon with parameters “salmon quant -i \$salmon\_index -l A \-1 \$Input1 \-2  
568 \$Input2 \ p 8 -o quants/\${Input1}\_quant \ --gcBias --seqBias”. After getting the transcript counts,  
569 differentially expressed gene analysis was performed using the DEseq2 analysis pipeline (Love  
570 et al., 2014; Sonesson et al., 2015). Differentially expressed genes (DEGs) were obtained by  
571 comparisons of any two sequential stages (i.e. Early fetal versus Late fetal and Late fetal versus  
572 Neonatal) in a cell type specific manner. Genes were considered differentially expressed if the  
573 fold change between samples was greater than or equal to 1.5 with setting of Benjamini-  
574 Hochberg (BH) false discovery rate (FDR) adjusted P value of <0.05 in the package.  
575 Hierarchical clustering of samples were done with the cor() functions of R. Principal component  
576 analysis (PCA) was performed with the function *plotPCA* that comes with DEseq2 package.  
577 Visualization of RNA-seq data examined in this study were produced with pheatmap 1.0.12  
578 (Kolde, 2012) and ggplot2 (Wickham, 2009). GO term analysis was carried out using the R  
579 package clusterProfiler as described (Yu et al., 2012) with a Benjamini-Hochberg adjusted P  
580 value of <0.1.

581

### 582 **Comparison to extant human and mouse $\beta$ -cell transcriptomes**

583 Human (Arda et al., 2016; Blodgett et al., 2015) (GEO accession numbers GSE67543 and  
584 GSE79469) and mouse (Qiu et al., 2017) (GEO accession number GSE87375) datasets were  
585 obtained from the NCBI Gene Expression Omnibus (GEO). Indices for human and mouse  
586 libraries were built from reference transcriptomes GRCh38 cDNA and GRCm38 cDNA,  
587 respectively (Homo sapiens, version 96; Mus musculus, version 96; (Zerbino et al., 2018)). Pig  
588 and mouse Ensembl IDs were converted to their corresponding human Ensembl ID using  
589 predicted ortholog tables across these species obtained from Ensembl BioMart (Zerbino et al.,  
590 2018). Sample-wise hierarchical clustering analysis (Fig. 4A) was performed using dist()  
591 function of R.

592

### 593 **Identifying genes with dynamic expression**

594 To create lists of dynamically expressed genes, DEGs from comparisons between early fetal  
595 and late fetal stages and between late fetal and neonatal stage were intersected, which created  
596 lists of genes showing patterns of gene expression with up, down or no change directions as  
597 development proceeds in islets development. Gene TPM values shifted by +1, log based 2

598 transformed were averaged across biological replicates and subsequently standardized to their  
599 Z-scores.

600

### 601 **Identification of developmentally regulated MODY and NDM genes**

602 We queried 33 genes previously linked to MODY and/or NDM (Velayos et al., 2017; Yang  
603 and Chan, 2016), and identified 19 dynamically expressed genes during the transition from fetal  
604 to neonatal stages in pig  $\beta$ -,  $\alpha$ - or  $\delta$ -cells. Among these 19 candidates, we then used prior data  
605 sets (Blodgett et al., 2015) to identify a subset that also have dynamic expression in human islet  
606  $\beta$ - or  $\alpha$ -cells – a lack of available human  $\delta$ -cell datasets precludes this comparison for  $\delta$ -cells.

607

### 608 **Immunohistochemistry**

609 Biopsies of harvested pancreata were fixed in 4% paraformaldehyde (w/v) in PBS at 4°C  
610 overnight, washed twice in PBS, and cryoprotected via sucrose saturation. The tissues were  
611 imbedded in Tissue-Tek OCT compound (VWR, Cat# 25608-930) and stored at -80°C until  
612 sectioning. 10 $\mu$ m thick sections were collected on ThermoFisher Superfrost Plus slides. For  
613 staining, frozen slides were thawed at room temperature for 30 min and washed with PBS.  
614 Antigen retrieval was performed by boiling slides immersed in Target Retrieval Solution (DAKO,  
615 S169984-2) for 30 minutes, as needed. Subsequently, sections were incubated with  
616 streptavidin/biotin blocking solution (Vector Labs, SP-2002) according to manufacturer's  
617 instruction. Then, sections were incubated in permeabilization/blocking buffer (5% normal  
618 donkey serum, 0.3% Triton X-100 in PBS) at room temperature for 1 hour followed by overnight  
619 incubation at 4°C with primary antibodies diluted in Antibody dilution buffer (1% bovine serum  
620 albumin, 0.3% Triton X-100 in PBS). Slides were washed and stained with appropriate  
621 secondary antibodies for 1 hour at room temperature. Primary antibodies and dilutions used are  
622 as follows: guinea pig anti-insulin (DAKO, A0564, 1:1000), mouse anti-glucagon (Sigma-Aldrich,  
623 G2654, 1:1000), rabbit anti-SIX3 (LifeSpan Biosciences, LS-B9336, 1:100), goat anti-PDX1  
624 (R&D systems, AF2419, 1:200), mouse anti-human NKX6.1 (R&D systems, AF5857, 1:200,)   
625 rabbit anti-MAFB (Bethyl, IHC-00351, 1:200), rabbit anti-MAFA (AVIVA systems biology,  
626 ARP47760\_P050, 1:200), goat anti-somatostatin (Santa Cruz biotechnology, 1:500), rabbit anti-  
627 Chromogranin A (Immunostar, 20085, 1:500), rat anti-E-cadherin (Life Technologies, 13-1900  
628 1:500). Secondary antibodies used are donkey anti-isotype conjugated with Alexa Fluor  
629 488/555/647 (1:500; Molecular Probes). After a final wash with PBS, slides were preserved with  
630 a mounting medium containing DAPI (Vector labs, H-1200) and coverslipped. Image acquisition  
631 was performed on a Leica SP8 confocal microscope. Islet cells were quantified by counting

632 insulin positive  $\beta$ -cells, glucagon positive  $\alpha$ -cells, and somatostatin positive  $\delta$ -cells using  
633 pancreas sections from different stages.

634

### 635 **Morphometric Analysis**

636 Tissue sections were prepared as above. Single-channel images were captured using a Zeiss  
637 Axio Imager M2 microscope using a 20X objective with the AxioVision version 4.8 software.  
638 Respective channel images were then imported into the Image-Pro Plus version 5 software  
639 (Media Cybernetics, Inc.). Quantification of hormone<sup>+</sup> cells was performed by using the count  
640 function within the Measure menu. The number of individual hormone<sup>+</sup> cells were then  
641 summated for each developmental stage, and the fractional percentage comprising each of the  
642 three cell types was calculated. To determine the percentage of  $\beta$ -,  $\alpha$ -, and  $\delta$ -cells which were  
643 undergoing cell division at each developmental stage, slides were stained for a combination of  
644 insulin, glucagon, and Ki67 or insulin, somatostatin, and Ki67. Single-channel images were  
645 collected as above and then merged into a multi-channel image using the Image-Pro Plus  
646 software. Cells which were Ki67<sup>+</sup> and hormone<sup>+</sup>, as well as the total number of hormone<sup>+</sup> cells,  
647 were then counted manually.

648

### 649 **In vitro insulin secretion assay**

650 Functional maturity of NICCs isolated from late fetal or 22-day old piglets was assessed by in  
651 vitro glucose stimulated insulin secretion (GSIS) assay performed after 5 days of culture. In brief,  
652 100 NICCs were washed and incubated at 2.8 mM glucose for 1 hour. After the initial  
653 preincubation, clusters were serially incubated in media above containing 2.8 mM, 20 mM, and  
654 20 mM plus IMBX glucose concentrations for 1 hour each. Finally, clusters were lysed in acid-  
655 ethanol solution to extract the total insulin content. Insulin from supernatants and the NICC  
656 lysates was quantified using the pig insulin ELISA kit (Mercodia, 10-12000-01). Secreted insulin  
657 is presented as a percent of total insulin detected in lysate. All steps were performed in triplicate  
658 at 37°C using RPMI 1640 supplemented with 2% porcine serum adjusted to the respective  
659 glucose concentrations.

660

### 661 **In vitro active GLP-1 assay**

662 Islet cell clusters were handpicked immediately after isolation, washed twice in ice cold PBS,  
663 then resuspended in 4°C lysis buffer containing DPP4 inhibitor (EMD Millipore, DPP4). Clusters  
664 were sonicated at 4°C and immediately stored at -80°C. Active GLP-1 (7-36) was measured  
665 using the Mouse / Rat GLP-1 Active (7-36) ELISA Kit (Eagle Biosciences, GP121-K01).

666

667 **Statistical analysis**

668 For qRT-PCR, GSIS and quantification of immunohistology experiments, the number of  
669 biological or technical replicates (n), measure of central tendency (e.g. average), standard  
670 deviation (SD), and statistical analysis is detailed in the Figure legend. Graphs and statistical  
671 analysis were produced and performed by using GraphPad Prism (version 8) software.

672

673 **Acknowledgements**

674 We thank past and current members of the Kim group for advice and encouragement, Dr. Sam  
675 Baker (Stanford, Dept. of Comparative Medicine, Veterinary Service Center), Dr. Jing Wang  
676 (Stanford Diabetes Research Center and Stanford Islet Research Core) and Michael Alexander  
677 (U.C. Irvine) for assistance with pig pancreas work, Serena Whitener for help developing the pig  
678 pancreas gene expression browser, Dr. Kyle Loh for stimulating discussions, and Drs. Dan Lu  
679 and Ramesh Nair for help on bioinformatics.

680

681 **Competing interests:** Nothing to declare

682

683 **Funding**

684 This work was supported by a Deans Innovation Fund from the Dept. of Developmental Biology  
685 (Stanford), and by fellowship awards from the L.L. Hillblom Foundation (2017-D-008-FEL) to  
686 S.K., from the Division of Endocrinology T32 training grant (DK007217-41, A. Hoffman and F.  
687 Kraemer) to R.L.W., and from the Stanford Child Health Research Institute (UL1 TR001085)  
688 and the American Diabetes Association (1-16-PDF-086) to H.P. Work in the Kim lab was also  
689 supported by grants from the U.S. National Institutes of Health P30 DK116074, and by the  
690 Stanford Islet Research Core and Diabetes Genomics and Analysis Core of Stanford Diabetes  
691 Research Center.

692

693 **Data Availability**

694 The data discussed in this publication have been deposited in NCBI's Gene Expression  
695 Omnibus (Edgar et al., 2002) and are accessible through GEO Series accession number  
696 GSE143889 (<https://www.ncbi.nlm.nih.gov/geo/query/acc.cgi?acc=GSE143889>).

697

698 **Requests for materials & correspondence** should be addressed to Seung K. Kim.

699

700 **Author contributions**

701 S.K., R.L.W. and S.K.K. designed the study; S.K, R.L.W, X.G., C.A.C., J.Y.L., I.P., R.J.B., and  
702 K.T. performed the experiments; J.C., S.R.Q., J.R.T.L., R.B., and P.J.R. shared materials; S.K.,  
703 R.L.W., H.P., and S.K.K analyzed the data and wrote the manuscript.

704 **References**

- 705
- 706 **Aguayo-Mazzucato, C., Koh, A., El Khattabi, I., Li, W. C., Toschi, E., Jermendy, A., Juhl,**  
707 **K., Mao, K., Weir, G. C., Sharma, A., et al. (2011).** Maf expression enhances glucose-  
708 responsive insulin secretion in neonatal rat beta cells. *Diabetologia* **54**, 583-593.
- 709 **Ang, L. T., Tan, A. K. Y., Autio, M. I., Goh, S. H., Choo, S. H., Lee, K. L., Tan, J., Pan, B.,**  
710 **Lee, J. J. H., Lum, J. J., et al. (2018).** A Roadmap for Human Liver Differentiation from  
711 Pluripotent Stem Cells. *Cell Rep* **22**, 2190-2205.
- 712 **Arda, H. E., Benitez, C. M. and Kim, S. K. (2013).** Gene regulatory networks governing  
713 pancreas development. *Dev Cell* **25**, 5-13.
- 714 **Arda, H. E., Li, L., Tsai, J., Torre, E. A., Rosli, Y., Peiris, H., Spitale, R. C., Dai, C., Gu, X.,**  
715 **Qu, K., et al. (2016).** Age-Dependent Pancreatic Gene Regulation Reveals Mechanisms  
716 Governing Human beta Cell Function. *Cell metabolism* **23**, 909-920.
- 717 **Arda, H. E., Tsai, J., Rosli, Y. R., Giresi, P., Bottino, R., Greenleaf, W. J., Chang, H. Y. and**  
718 **Kim, S. K. (2018).** A Chromatin Basis for Cell Lineage and Disease Risk in the Human  
719 Pancreas. *Cell Syst* **7**, 310-322 e314.
- 720 **Artner, I., Bianchi, B., Raum, J. C., Guo, M., Kaneko, T., Cordes, S., Sieweke, M. and Stein,**  
721 **R. (2007).** MafB is required for islet beta cell maturation. *Proc Natl Acad Sci U S A* **104**,  
722 3853-3858.
- 723 **Artner, I., Hang, Y., Mazur, M., Yamamoto, T., Guo, M., Lindner, J., Magnuson, M. A. and**  
724 **Stein, R. (2010).** MafA and MafB regulate genes critical to beta-cells in a unique temporal  
725 manner. *Diabetes* **59**, 2530-2539.
- 726 **Avrahami, D., Li, C., Zhang, J., Schug, J., Avrahami, R., Rao, S., Stadler, M. B., Burger, L.,**  
727 **Schubeler, D., Glaser, B., et al. (2015).** Aging-Dependent Demethylation of Regulatory  
728 Elements Correlates with Chromatin State and Improved beta Cell Function. *Cell*  
729 *metabolism* **22**, 619-632.
- 730 **Benner, C., van der Meulen, T., Caceres, E., Tigyi, K., Donaldson, C. J. and Huising, M. O.**  
731 (2014). The transcriptional landscape of mouse beta cells compared to human beta cells  
732 reveals notable species differences in long non-coding RNA and protein-coding gene  
733 expression. *BMC Genomics* **15**, 620.
- 734 **Blandino-Rosano, M., Barbaresso, R., Jimenez-Palomares, M., Bozadjieva, N., Werneck-**  
735 **de-Castro, J. P., Hatanaka, M., Mirmira, R. G., Sonenberg, N., Liu, M., Ruegg, M. A., et**  
736 **al. (2017).** Loss of mTORC1 signalling impairs beta-cell homeostasis and insulin  
737 processing. *Nat Commun* **8**, 16014.
- 738 **Blodgett, D. M., Nowosielska, A., Afik, S., Pechhold, S., Cura, A. J., Kennedy, N. J., Kim,**  
739 **S., Kucukural, A., Davis, R. J., Kent, S. C., et al. (2015).** Novel Observations From Next-  
740 Generation RNA Sequencing of Highly Purified Human Adult and Fetal Islet Cell Subsets.  
741 *Diabetes* **64**, 3172-3181.
- 742 **Blum, B., Hrvatin, S., Schuetz, C., Bonal, C., Rezania, A. and Melton, D. A. (2012).**  
743 Functional beta-cell maturation is marked by an increased glucose threshold and by  
744 expression of urocortin 3. *Nat Biotechnol* **30**, 261-264.
- 745 **Bramswig, N. C., Everett, L. J., Schug, J., Dorrell, C., Liu, C., Luo, Y., Streeter, P. R., Naji,**  
746 **A., Grompe, M. and Kaestner, K. H. (2013).** Epigenomic plasticity enables human  
747 pancreatic alpha to beta cell reprogramming. *J Clin Invest* **123**, 1275-1284.
- 748 **Brissova, M., Fowler, M. J., Nicholson, W. E., Chu, A., Hirshberg, B., Harlan, D. M. and**  
749 **Powers, A. C. (2005).** Assessment of human pancreatic islet architecture and composition  
750 by laser scanning confocal microscopy. *J Histochem Cytochem* **53**, 1087-1097.
- 751 **Brun, P. J., Grijalva, A., Rausch, R., Watson, E., Yuen, J. J., Das, B. C., Shudo, K.,**  
752 **Kagechika, H., Leibel, R. L. and Blaner, W. S. (2015).** Retinoic acid receptor signaling is  
753 required to maintain glucose-stimulated insulin secretion and beta-cell mass. *FASEB J* **29**,  
754 671-683.



- 755 **Camunas-Soler, J., Dai, X., Hang, Y., Bautista, A., Lyon, J., Suzuki, K., Kim, S. K., Quake,**  
756 **S. R. and MacDonald, P. E.** (2019). Pancreas patch-seq links physiologic dysfunction in  
757 diabetes to single-cell transcriptomic phenotypes. *bioRxiv*, 555110.
- 758 **Capozzi, M. E., Svendsen, B., Encisco, S. E., Lewandowski, S. L., Martin, M. D., Lin, H.,**  
759 **Jaffe, J. L., Coch, R. W., Haldeman, J. M., MacDonald, P. E., et al.** (2019). beta Cell tone  
760 is defined by proglucagon peptides through cAMP signaling. *JCI Insight* **4**.
- 761 **Carlsson, G. L., Heller, R. S., Serup, P. and Hyttel, P.** (2010). Immunohistochemistry of  
762 pancreatic development in cattle and pig. *Anat Histol Embryol* **39**, 107-119.
- 763 **Cerolsaletti, K., Hao, W. and Greenbaum, C. J.** (2019). Genetics Coming of Age in Type 1  
764 Diabetes. *Diabetes Care* **42**, 189-191.
- 765 **Chakravarthy, H., Gu, X., Enge, M., Dai, X., Wang, Y., Damond, N., Downie, C., Liu, K.,**  
766 **Wang, J., Xing, Y., et al.** (2017). Converting Adult Pancreatic Islet alpha Cells into beta  
767 Cells by Targeting Both Dnmt1 and Arx. *Cell metabolism* **25**, 622-634.
- 768 **Collombat, P., Mansouri, A., Hecksher-Sorensen, J., Serup, P., Krull, J., Gradwohl, G. and**  
769 **Gruss, P.** (2003). Opposing actions of Arx and Pax4 in endocrine pancreas development.  
770 *Genes Dev* **17**, 2591-2603.
- 771 **Dai, C., Hang, Y., Shostak, A., Poffenberger, G., Hart, N., Prasad, N., Phillips, N., Levy, S.**  
772 **E., Greiner, D. L., Shultz, L. D., et al.** (2017). Age-dependent human beta cell proliferation  
773 induced by glucagon-like peptide 1 and calcineurin signaling. *J Clin Invest* **127**, 3835-3844.
- 774 **DiGruccio, M. R., Mawla, A. M., Donaldson, C. J., Noguchi, G. M., Vaughan, J., Cowing-**  
775 **Zitron, C., van der Meulen, T. and Huising, M. O.** (2016). Comprehensive alpha, beta and  
776 delta cell transcriptomes reveal that ghrelin selectively activates delta cells and promotes  
777 somatostatin release from pancreatic islets. *Mol Metab* **5**, 449-458.
- 778 **Drucker, D. J.** (2013). Incretin action in the pancreas: potential promise, possible perils, and  
779 pathological pitfalls. *Diabetes* **62**, 3316-3323.
- 780 **Dyson, M. C., Alloosh, M., Vuchetich, J. P., Mokolke, E. A. and Sturek, M.** (2006).  
781 Components of metabolic syndrome and coronary artery disease in female Ossabaw swine  
782 fed excess atherogenic diet. *Comp Med* **56**, 35-45.
- 783 **Edgar, R., Domrachev, M. and Lash, A. E.** (2002). Gene Expression Omnibus: NCBI gene  
784 expression and hybridization array data repository. *Nucleic Acids Res* **30**, 207-210.
- 785 **Ferrer, J., Scott, W. E., 3rd, Weegman, B. P., Suszynski, T. M., Sutherland, D. E., Hering,**  
786 **B. J. and Papas, K. K.** (2008). Pig pancreas anatomy: implications for pancreas  
787 procurement, preservation, and islet isolation. *Transplantation* **86**, 1503-1510.
- 788 **Fisher, J. E., Lillegard, J. B., McKenzie, T. J., Rodysill, B. R., Wettstein, P. J. and Nyberg,**  
789 **S. L.** (2013). In utero transplanted human hepatocytes allow postnatal engraftment of  
790 human hepatocytes in pigs. *Liver transplantation : official publication of the American*  
791 *Association for the Study of Liver Diseases and the International Liver Transplantation*  
792 *Society* **19**, 328-335.
- 793 **Georgia, S. and Bhushan, A.** (2004). Beta cell replication is the primary mechanism for  
794 maintaining postnatal beta cell mass. *J Clin Invest* **114**, 963-968.
- 795 **Hart, N. J. and Powers, A. C.** (2019). Use of human islets to understand islet biology and  
796 diabetes: progress, challenges and suggestions. *Diabetologia* **62**, 212-222.
- 797 **Hassouna, T., Seeberger, K. L., Salama, B. and Korbitt, G. S.** (2018). Functional Maturation  
798 and In Vitro Differentiation of Neonatal Porcine Islet Grafts. *Transplantation* **102**, e413-  
799 e423.
- 800 **Hattersley, A. T. and Patel, K. A.** (2017). Precision diabetes: learning from monogenic  
801 diabetes. *Diabetologia* **60**, 769-777.
- 802 **Holst, J. J., Holland, W., Gromada, J., Lee, Y., Unger, R. H., Yan, H., Sloop, K. W., Kieffer,**  
803 **T. J., Damond, N. and Herrera, P. L.** (2017). Insulin and Glucagon: Partners for Life.  
804 *Endocrinology* **158**, 696-701.

- 805 **Hrvatin, S., Deng, F., O'Donnell, C. W., Gifford, D. K. and Melton, D. A.** (2014a). MARIS:  
806 method for analyzing RNA following intracellular sorting. *PLoS One* **9**, e89459.
- 807 **Hrvatin, S., O'Donnell, C. W., Deng, F., Millman, J. R., Pagliuca, F. W., Dilorio, P., Rezanja,**  
808 **A., Gifford, D. K. and Melton, D. A.** (2014b). Differentiated human stem cells resemble  
809 fetal, not adult,  $\beta$  cells. *Proceedings of the National Academy of Sciences* **111**, 3038.
- 810 **Jeon, J., Correa-Medina, M., Ricordi, C., Edlund, H. and Diez, J. A.** (2009). Endocrine cell  
811 clustering during human pancreas development. *J Histochem Cytochem* **57**, 811-824.
- 812 **Jorgensen, M. C., Ahnfelt-Ronne, J., Hald, J., Madsen, O. D., Serup, P. and Hecksher-**  
813 **Sorensen, J.** (2007). An illustrated review of early pancreas development in the mouse.  
814 *Endocr Rev* **28**, 685-705.
- 815 **Kemter, E., Cohrs, C. M., Schafer, M., Schuster, M., Steinmeyer, K., Wolf-van Buerck, L.,**  
816 **Wolf, A., Wuensch, A., Kurome, M., Kessler, B., et al.** (2017). INS-eGFP transgenic pigs:  
817 a novel reporter system for studying maturation, growth and vascularisation of neonatal  
818 islet-like cell clusters. *Diabetologia* **60**, 1152-1156.
- 819 **Kolde, R.** (2012). Pheatmap: pretty heatmaps. *R package version* **61**, 617.
- 820 **Lamb, M., Laugenour, K., Liang, O., Alexander, M., Foster, C. E. and Lakey, J. R.** (2014). In  
821 vitro maturation of viable islets from partially digested young pig pancreas. *Cell Transplant*  
822 **23**, 263-272.
- 823 **Lee, Y. H., Wang, M. Y., Yu, X. X. and Unger, R. H.** (2016). Glucagon is the key factor in the  
824 development of diabetes. *Diabetologia* **59**, 1372-1375.
- 825 **Lemaire, K., Granvik, M., Schraenen, A., Goyvaerts, L., Van Lommel, L., Gomez-Ruiz, A.,**  
826 **In 't Veld, P., Gilon, P. and Schuit, F.** (2017). How stable is repression of disallowed  
827 genes in pancreatic islets in response to metabolic stress? *PLoS One* **12**, e0181651.
- 828 **Lemaire, K., Thorrez, L. and Schuit, F.** (2016). Disallowed and Allowed Gene Expression:  
829 Two Faces of Mature Islet Beta Cells. *Annu Rev Nutr* **36**, 45-71.
- 830 **Lim, H., Lim, Y. M., Kim, K. H., Jeon, Y. E., Park, K., Kim, J., Hwang, H. Y., Lee, D. J.,**  
831 **Pagire, H., Kwon, H. J., et al.** (2018). A novel autophagy enhancer as a therapeutic agent  
832 against metabolic syndrome and diabetes. *Nat Commun* **9**, 1438.
- 833 **Lin, H. M., Lee, J. H., Yadav, H., Kamaraju, A. K., Liu, E., Zhigang, D., Vieira, A., Kim, S. J.,**  
834 **Collins, H., Matschinsky, F., et al.** (2009). Transforming growth factor-beta/Smad3  
835 signaling regulates insulin gene transcription and pancreatic islet beta-cell function. *J Biol*  
836 *Chem* **284**, 12246-12257.
- 837 **Loh, K. M., Ang, L. T., Zhang, J., Kumar, V., Ang, J., Auyeong, J. Q., Lee, K. L., Choo, S.**  
838 **H., Lim, C. Y., Nichane, M., et al.** (2014). Efficient endoderm induction from human  
839 pluripotent stem cells by logically directing signals controlling lineage bifurcations. *Cell Stem*  
840 *Cell* **14**, 237-252.
- 841 **Love, M. I., Huber, W. and Anders, S.** (2014). Moderated estimation of fold change and  
842 dispersion for RNA-seq data with DESeq2. *Genome Biol* **15**, 550.
- 843 **Lukinius, A., Ericsson, J. L., Grimelius, L. and Korsgren, O.** (1992). Ultrastructural studies of  
844 the ontogeny of fetal human and porcine endocrine pancreas, with special reference to  
845 colocalization of the four major islet hormones. *Dev Biol* **153**, 376-385.
- 846 **Maestro, M. A., Cardalda, C., Boj, S. F., Luco, R. F., Servitja, J. M. and Ferrer, J.** (2007).  
847 Distinct roles of HNF1beta, HNF1alpha, and HNF4alpha in regulating pancreas  
848 development, beta-cell function and growth. *Endocr Dev* **12**, 33-45.
- 849 **Matsunari, H., Nagashima, H., Watanabe, M., Umeyama, K., Nakano, K., Nagaya, M.,**  
850 **Kobayashi, T., Yamaguchi, T., Sumazaki, R., Herzenberg, L. A., et al.** (2013). Blastocyst  
851 complementation generates exogenic pancreas in vivo in apancreatic cloned pigs. *Proc Natl*  
852 *Acad Sci U S A* **110**, 4557-4562.
- 853 **McKnight, K. D., Wang, P. and Kim, S. K.** (2010). Deconstructing pancreas development to  
854 reconstruct human islets from pluripotent stem cells. *Cell Stem Cell* **6**, 300-308.

- 855 **Meier, J. J., Butler, A. E., Saisho, Y., Monchamp, T., Galasso, R., Bhushan, A., Rizza, R. A.**  
856 **and Butler, P. C.** (2008). Beta-cell replication is the primary mechanism subserving the  
857 postnatal expansion of beta-cell mass in humans. *Diabetes* **57**, 1584-1594.
- 858 **Miguel-Escalada, I., Bonas-Guarch, S., Cebola, I., Ponsa-Cobas, J., Mendieta-Esteban, J.,**  
859 **Atla, G., Javierre, B. M., Rolando, D. M. Y., Farabella, I., Morgan, C. C., et al.** (2019).  
860 Human pancreatic islet three-dimensional chromatin architecture provides insights into the  
861 genetics of type 2 diabetes. *Nat Genet* **51**, 1137-1148.
- 862 **Mueller, K. R., Balamurugan, A. N., Cline, G. W., Pongratz, R. L., Hooper, R. L., Weegman,**  
863 **B. P., Kitzmann, J. P., Taylor, M. J., Graham, M. L., Schuurman, H. J., et al.** (2013).  
864 Differences in glucose-stimulated insulin secretion in vitro of islets from human, nonhuman  
865 primate, and porcine origin. *Xenotransplantation* **20**, 75-81.
- 866 **Muraro, M. J., Dharmadhikari, G., Grun, D., Groen, N., Dielen, T., Jansen, E., van Gorp, L.,**  
867 **Engelse, M. A., Carlotti, F., de Koning, E. J., et al.** (2016). A Single-Cell Transcriptome  
868 Atlas of the Human Pancreas. *Cell Syst* **3**, 385-394 e383.
- 869 **Nagaya, M., Hayashi, A., Nakano, K., Honda, M., Hasegawa, K., Okamoto, K., Itazaki, S.,**  
870 **Matsunari, H., Watanabe, M., Umeyama, K., et al.** (2019). Distributions of endocrine cell  
871 clusters during porcine pancreatic development. *PLoS One* **14**, e0216254.
- 872 **Nair, G. G., Liu, J. S., Russ, H. A., Tran, S., Saxton, M. S., Chen, R., Juang, C., Li, M. L.,**  
873 **Nguyen, V. Q., Giacometti, S., et al.** (2019). Recapitulating endocrine cell clustering in  
874 culture promotes maturation of human stem-cell-derived beta cells. *Nat Cell Biol* **21**, 263-  
875 274.
- 876 **Pagliuca, F. W., Millman, J. R., Gurtler, M., Segel, M., Van Dervort, A., Ryu, J. H., Peterson,**  
877 **Q. P., Greiner, D. and Melton, D. A.** (2014). Generation of functional human pancreatic  
878 beta cells in vitro. *Cell* **159**, 428-439.
- 879 **Pan, F. C. and Brissova, M.** (2014). Pancreas development in humans. *Current opinion in*  
880 *endocrinology, diabetes, and obesity* **21**, 77-82.
- 881 **Patro, R., Duggal, G., Love, M. I., Irizarry, R. A. and Kingsford, C.** (2017). Salmon provides  
882 fast and bias-aware quantification of transcript expression. *Nat Methods* **14**, 417-419.
- 883 **Pearson, E. R.** (2019). Type 2 diabetes: a multifaceted disease. *Diabetologia* **62**, 1107-1112.
- 884 **Peiris, H., Park, S., Louis, S., Gu, X., Lam, J. Y., Asplund, O., Ippolito, G. C., Bottino, R.,**  
885 **Groop, L., Tucker, H., et al.** (2018). Discovering human diabetes-risk gene function with  
886 genetics and physiological assays. *Nat Commun* **9**, 3855.
- 887 **Perez-Alcantara, M., Honore, C., Wesolowska-Andersen, A., Gloyn, A. L., McCarthy, M. I.,**  
888 **Hansson, M., Beer, N. L. and van de Bunt, M.** (2018). Patterns of differential gene  
889 expression in a cellular model of human islet development, and relationship to type 2  
890 diabetes predisposition. *Diabetologia* **61**, 1614-1622.
- 891 **Pullen, T. J., Huising, M. O. and Rutter, G. A.** (2017). Analysis of Purified Pancreatic Islet  
892 Beta and Alpha Cell Transcriptomes Reveals 11beta-Hydroxysteroid Dehydrogenase  
893 (Hsd11b1) as a Novel Disallowed Gene. *Front Genet* **8**, 41.
- 894 **Pullen, T. J., Khan, A. M., Barton, G., Butcher, S. A., Sun, G. and Rutter, G. A.** (2010).  
895 Identification of genes selectively disallowed in the pancreatic islet. *Islets* **2**, 89-95.
- 896 **Qiu, W.-L., Zhang, Y.-W., Feng, Y., Li, L.-C., Yang, L. and Xu, C.-R.** (2017). Deciphering  
897 Pancreatic Islet  $\beta$  Cell and  $\alpha$  Cell Maturation Pathways and Characteristic Features at the  
898 Single-Cell Level. *Cell metabolism* **25**, 1194-1205.e1194.
- 899 **Ramond, C., Beydag-Tasoz, B. S., Azad, A., van de Bunt, M., Petersen, M. B. K., Beer, N.**  
900 **L., Glaser, N., Berthault, C., Gloyn, A. L., Hansson, M., et al.** (2018). Understanding  
901 human fetal pancreas development using subpopulation sorting, RNA sequencing and  
902 single-cell profiling. *Development* **145**.
- 903 **Renner, S., Braun-Reichhart, C., Blutke, A., Herbach, N., Emrich, D., Streckel, E., Wunsch,**  
904 **A., Kessler, B., Kurome, M., Bahr, A., et al.** (2013). Permanent neonatal diabetes in  
905 INS(C94Y) transgenic pigs. *Diabetes* **62**, 1505-1511.

- 906 **Rezania, A., Bruin, J. E., Arora, P., Rubin, A., Batushansky, I., Asadi, A., O'Dwyer, S.,**  
907 **Quiskamp, N., Mojibian, M., Albrecht, T., et al.** (2014). Reversal of diabetes with insulin-  
908 producing cells derived in vitro from human pluripotent stem cells. *Nat Biotechnol* **32**, 1121-  
909 1133.
- 910 **Riopel, M., Li, J., Fellows, G. F., Goodyer, C. G. and Wang, R.** (2014). Ultrastructural and  
911 immunohistochemical analysis of the 8-20 week human fetal pancreas. *Islets* **6**, e982949.
- 912 **Rorsman, P., Berggren, P. O., Bokvist, K., Ericson, H., Mohler, H., Ostenson, C. G. and**  
913 **Smith, P. A.** (1989). Glucose-inhibition of glucagon secretion involves activation of GABAA-  
914 receptor chloride channels. *Nature* **341**, 233-236.
- 915 **Rorsman, P. and Huising, M. O.** (2018). The somatostatin-secreting pancreatic delta-cell in  
916 health and disease. *Nat Rev Endocrinol* **14**, 404-414.
- 917 **Rouille, Y., Martin, S. and Steiner, D. F.** (1995). Differential processing of proglucagon by the  
918 subtilisin-like prohormone convertases PC2 and PC3 to generate either glucagon or  
919 glucagon-like peptide. *J Biol Chem* **270**, 26488-26496.
- 920 **Russ, H. A., Parent, A. V., Ringler, J. J., Hennings, T. G., Nair, G. G., Shveygert, M., Guo,**  
921 **T., Puri, S., Haataja, L., Cirulli, V., et al.** (2015). Controlled induction of human pancreatic  
922 progenitors produces functional beta-like cells in vitro. *The EMBO journal* **34**, 1759-1772.
- 923 **Sanyoura, M., Philipson, L. H. and Naylor, R.** (2018). Monogenic Diabetes in Children and  
924 Adolescents: Recognition and Treatment Options. *Curr Diab Rep* **18**, 58.
- 925 **Schaffer, A. E., Taylor, B. L., Benthuyesen, J. R., Liu, J., Thorel, F., Yuan, W., Jiao, Y.,**  
926 **Kaestner, K. H., Herrera, P. L., Magnuson, M. A., et al.** (2013). Nkx6.1 controls a gene  
927 regulatory network required for establishing and maintaining pancreatic Beta cell identity.  
928 *PLoS Genet* **9**, e1003274.
- 929 **Sekine, N., Cirulli, V., Regazzi, R., Brown, L. J., Gine, E., Tamarit-Rodriguez, J., Girotti, M.,**  
930 **Marie, S., MacDonald, M. J., Wollheim, C. B., et al.** (1994). Low lactate dehydrogenase  
931 and high mitochondrial glycerol phosphate dehydrogenase in pancreatic beta-cells.  
932 Potential role in nutrient sensing. *J Biol Chem* **269**, 4895-4902.
- 933 **Sheets, T. P., Park, K. E., Park, C. H., Swift, S. M., Powell, A., Donovan, D. M. and Telugu,**  
934 **B. P.** (2018). Targeted Mutation of NGN3 Gene Disrupts Pancreatic Endocrine Cell  
935 Development in Pigs. *Sci Rep* **8**, 3582.
- 936 **Sneddon, J. B., Tang, Q., Stock, P., Bluestone, J. A., Roy, S., Desai, T. and Hebrok, M.**  
937 (2018). Stem Cell Therapies for Treating Diabetes: Progress and Remaining Challenges.  
938 *Cell Stem Cell* **22**, 810-823.
- 939 **Sodoyez-Goffaux, F., Sodoyez, J. C., De Vos, C. J. and Foa, P. P.** (1979). Insulin and  
940 glucagon secretion by islets isolated from fetal and neonatal rats. *Diabetologia* **16**, 121-123.
- 941 **Soneson, C., Love, M. I. and Robinson, M. D.** (2015). Differential analyses for RNA-seq:  
942 transcript-level estimates improve gene-level inferences. *F1000Res* **4**, 1521.
- 943 **Steiner, D. F.** (1998). The proprotein convertases. *Curr Opin Chem Biol* **2**, 31-39.
- 944 **Sugiyama, T., Benitez, C. M., Ghodasara, A., Liu, L., McLean, G. W., Lee, J., Blauwkamp,**  
945 **T. A., Nusse, R., Wright, C. V., Gu, G., et al.** (2013). Reconstituting pancreas development  
946 from purified progenitor cells reveals genes essential for islet differentiation. *Proc Natl Acad*  
947 *Sci U S A* **110**, 12691-12696.
- 948 **Svendsen, B., Larsen, O., Gabe, M. B. N., Christiansen, C. B., Rosenkilde, M. M., Drucker,**  
949 **D. J. and Holst, J. J.** (2018). Insulin Secretion Depends on Intra-islet Glucagon Signaling.  
950 *Cell Rep* **25**, 1127-1134 e1122.
- 951 **Tengholm, A. and Gylfe, E.** (2017). cAMP signalling in insulin and glucagon secretion.  
952 *Diabetes Obes Metab* **19 Suppl 1**, 42-53.
- 953 **Teta, M., Rankin, M. M., Long, S. Y., Stein, G. M. and Kushner, J. A.** (2007). Growth and  
954 regeneration of adult beta cells does not involve specialized progenitors. *Dev Cell* **12**, 817-  
955 826.

- 956 **Thorrez, L., Laudadio, I., Van Deun, K., Quintens, R., Hendrickx, N., Granvik, M., Lemaire,**  
957 **K., Schraenen, A., Van Lommel, L., Lehnert, S., et al. (2011).** Tissue-specific  
958 disallowance of housekeeping genes: the other face of cell differentiation. *Genome Res* **21**,  
959 95-105.
- 960 **Umeyama, K., Watanabe, M., Saito, H., Kurome, M., Tohi, S., Matsunari, H., Miki, K. and**  
961 **Nagashima, H. (2009).** Dominant-negative mutant hepatocyte nuclear factor 1alpha  
962 induces diabetes in transgenic-cloned pigs. *Transgenic Res* **18**, 697-706.
- 963 **van der Meulen, T., Donaldson, C. J., Caceres, E., Hunter, A. E., Cowing-Zitron, C., Pound,**  
964 **L. D., Adams, M. W., Zembrzycki, A., Grove, K. L. and Huising, M. O. (2015).** Urocortin3  
965 mediates somatostatin-dependent negative feedback control of insulin secretion. *Nat Med*  
966 **21**, 769-776.
- 967 **Velayos, T., Martinez, R., Alonso, M., Garcia-Etxebarria, K., Aguayo, A., Camarero, C.,**  
968 **Urrutia, I., Martinez de LaPiscina, I., Barrio, R., Santin, I., et al. (2017).** An Activating  
969 Mutation in STAT3 Results in Neonatal Diabetes Through Reduced Insulin Synthesis.  
970 *Diabetes* **66**, 1022-1029.
- 971 **Wende, A. R., Huss, J. M., Schaeffer, P. J., Giguere, V. and Kelly, D. P. (2005).** PGC-1alpha  
972 coactivates PDK4 gene expression via the orphan nuclear receptor ERRalpha: a  
973 mechanism for transcriptional control of muscle glucose metabolism. *Mol Cell Biol* **25**,  
974 10684-10694.
- 975 **Wickham, H. (2009).** ggplot2: Elegant Graphics for Data Analysis. *Use R*, 1-212.
- 976 **Wilson, M. E., Kalamaras, J. A. and German, M. S. (2002).** Expression pattern of IAPP and  
977 prohormone convertase 1/3 reveals a distinctive set of endocrine cells in the embryonic  
978 pancreas. *Mech Dev* **115**, 171-176.
- 979 **Wu, J., Platero-Luengo, A., Sakurai, M., Sugawara, A., Gil, M. A., Yamauchi, T., Suzuki, K.,**  
980 **Bogliotti, Y. S., Cuello, C., Morales Valencia, M., et al. (2017).** Interspecies Chimerism  
981 with Mammalian Pluripotent Stem Cells. *Cell* **168**, 473-486 e415.
- 982 **Yang, Y. and Chan, L. (2016).** Monogenic Diabetes: What It Teaches Us on the Common  
983 Forms of Type 1 and Type 2 Diabetes. *Endocr Rev* **37**, 190-222.
- 984 **Yokoi, N., Gheni, G., Takahashi, H. and Seino, S. (2016).** beta-Cell glutamate signaling: Its  
985 role in incretin-induced insulin secretion. *J Diabetes Investig* **7 Suppl 1**, 38-43.
- 986 **Yu, G., Wang, L. G., Han, Y. and He, Q. Y. (2012).** clusterProfiler: an R package for comparing  
987 biological themes among gene clusters. *OMICS* **16**, 284-287.
- 988 **Zerbino, D. R., Achuthan, P., Akanni, W., Amode, M. R., Barrell, D., Bhai, J., Billis, K.,**  
989 **Cummins, C., Gall, A., Giron, C. G., et al. (2018).** Ensembl 2018. *Nucleic Acids Res* **46**,  
990 D754-D761.
- 991 **Zhu, L., Dattaroy, D., Pham, J., Wang, L., Barella, L. F., Cui, Y., Wilkins, K. J., Roth, B. L.,**  
992 **Hochgeschwender, U., Matschinsky, F. M., et al. (2019).** Intra-islet glucagon signaling is  
993 critical for maintaining glucose homeostasis. *JCI Insight* **5**.
- 994

995 **Figure legends**

996 **Figure 1.** Pancreas dissociation and FACS purification of islet cells from fetal and neonatal pigs.  
997 (A) Schematic representation of the study design. (B) qRT-PCR analysis of *INS*, *GCG*, *SST*,  
998 *KRT*, and *AMY2* of FACS sorted  $\beta$ -,  $\alpha$ - and  $\delta$ -cell populations from P22 neonatal pigs. The fold  
999 change ( $2^{-\Delta\Delta CT}$ ) relative to the unsorted cell population is shown on the y-axis. (C) Heatmap  
1000 of differentially expressed genes (DEGs) in pig  $\beta$ -cells between early fetal, late fetal and  
1001 neonatal stages. (D) GO Term enrichment analysis of genes increasing with age in pig  $\beta$ -cells.  
1002 (E) Heatmap of DEGs in pig  $\alpha$ -cells between early fetal, late fetal and neonatal stages. (F) GO  
1003 Term enrichment analysis of genes increasing with age in pig  $\alpha$ -cells. (G) Heatmap of DEGs in  
1004 pig  $\delta$ -cells between late fetal and neonatal stages. (H) GO Term enrichment analysis of genes  
1005 increasing with age in pig  $\delta$ -cells. The Z-score scale represents  $\log_2(X+1)$  transformed  
1006 transcripts per million (TPM) counts. Red and blue color intensity of the Z-score indicates up-  
1007 regulation and down-regulation, respectively. Adjusted *P* value threshold for GO term analysis  
1008 was 0.1.

1009  
1010 **Figure 2.** Analysis of gene expression in developing pig islet  $\beta$ -,  $\alpha$ - and  $\delta$ -cells. (A-E,G,H)  
1011 Boxplots displaying normalized TPM (transcripts per million) counts of  $\beta$ -,  $\alpha$ -, and  $\delta$ -cell specific  
1012 genes (A-D), markers associated with proliferation (E), disallowed genes (G) and  $\beta$ -cell  
1013 functional regulators (G). (F) Quantification showing average percentage of  $INS^+$ ,  $GCG^+$  or  $SST^+$   
1014 cells that are  $Ki67^+$  in each developmental stage (n = 40 images per group, from 3 pigs per  
1015 group; bars show SD). Adjusted *P* value \*  $P \leq 0.05$ ; \*\*  $P \leq 0.01$ ; \*\*\*  $P \leq 0.001$

1016  
1017 **Figure 3.** Stage-specific expression of islet factors during development. (A-C) Immunostaining  
1018 of *INS* (green) and *GCG* (white) paired with Somatostatin (*SST*; red) (A), E-Cadherin (*ECad*;  
1019 white) (B), and Chromogranin-A (*CHGA*; white) (C) in the early fetal, neonatal, and adult pig  
1020 pancreas. (D-F) Immunostaining of the transcription factors *PDX1* (D), *NKX6.1* (E), and *MAFB*  
1021 (F) in the early fetal, neonatal, and adult pig pancreas. (G) Immunostaining of *SIX3* with *INS* and  
1022 *GCG* in adult pig pancreas. Insets indicated by the dashed yellow box. Scale bars, 50  $\mu m$ . (H, I)  
1023 qRT-PCR measures of relative mRNA levels encoding *SIX3* (H) and *SIX2* (I) in isolated  
1024 neonatal and adult pig islets (n=2, t-test; Error bars indicate SD).  $\Delta CT$  values for neonatal and  
1025 adult *SIX3* expression were 5.1 and 2.0, respectively (compared to  $\beta$ -Actin).  $\Delta CT$  values for  
1026 neonatal and adult *SIX2* (compared to  $\beta$ -Actin) were 7.2 and 2.6, respectively.

1027

1028 **Figure 4.** Comparison of gene expression in pig and human  $\beta$ - and  $\alpha$ -cell development. (A)  
1029 Unsupervised hierarchical clustering using distance matrices of neonatal pig, human, and  
1030 mouse  $\beta$ -cells. (B-G) Boxplots displaying normalized TPM (transcripts per million) counts of  
1031 select genes whose expression changes in a conserved manner between human and pig  
1032 development. Adjusted  $P$  value \*  $P \leq 0.05$ ; \*\*  $P \leq 0.01$ ; \*\*\*  $P \leq 0.001$ .

1033  
1034 **Figure 5.** Dynamic gene regulation during pig  $\beta$ - and  $\alpha$ -cell development. (A-B) Heat maps of  
1035 genes with altered expression from early fetal to neonatal stages in  $\beta$ -cells (A) and  $\alpha$ -cells (B),  
1036 showing 8 distinct clusters. Cluster 2 includes genes whose mRNA increased up to late fetal  
1037 stages then did not change thereafter. Cluster 7 includes genes whose mRNA declined then did  
1038 not change thereafter. Enriched GO terms in each cluster are shown to the right. Adjusted  $P$   
1039 value threshold was 0.1. The Z-score scale represents  $\log_2(X+1)$  transformed transcripts per  
1040 million (TPM) counts. Red and blue color intensity of the Z-score indicates up-regulation and  
1041 down-regulation, respectively. (C-D) The Z-score scale represents  $\log_2(X+1)$  transformed TPM  
1042 counts with total genes in  $\beta$ -cells (C) and  $\alpha$ -cells (D). Cluster 3 (Up-Down) or Cluster 6  
1043 (Down\_Up). Boxplots displaying normalized TPM (transcripts per million) counts of genes  
1044 shown. (E) Boxplots displaying normalized TPM (transcripts per million) counts of PCSK1  
1045 mRNA. (F) Immunostaining of PCSK1 (white) with insulin (INS; green) and glucagon (GCG; red)  
1046 in early fetal, late fetal and adult pig pancreas. Insets indicated by the dashed yellow box. White  
1047 arrows indicate PCSK1<sup>+</sup> GCG<sup>+</sup> (double positive) cells. (G) Concentrations of active GLP-1 in  
1048 lysates from pig islet cell clusters at different developmental stages (ANOVA, \*\*  $P \leq 0.01$ ; bars  
1049 indicate SD). (H) Boxplots displaying normalized TPM (transcripts per million) counts of *DPP4*  
1050 mRNA. (I) Immunostaining of DPP4 (white) with insulin (INS; green) and glucagon (GCG; red) in  
1051 early fetal, neonatal and adult pig pancreas. Insets indicated by the dashed yellow box. White  
1052 arrows indicate DPP4<sup>+</sup> INS<sup>+</sup> (double positive) cells. Adjusted  $P$  value \*  $P \leq 0.05$ ; \*\*  $P \leq 0.01$ ; \*\*\*  
1053  $P \leq 0.001$ , Scale bars, 50  $\mu\text{m}$ .

1054  
1055 **Figure 6.** Maturation of  $\beta$ -cell function in postnatal pigs. (A) Glucose-stimulated insulin secretion  
1056 (GSIS) assay measured insulin secretion in response to 2.8mM (low), 20mM (high) glucose and  
1057 20mM glucose + IBMX. Data show average secreted insulin as a percentage of insulin content  
1058 in the isolated islets from late fetal (n=4) and P22 (n=3) piglets (t-test, \*\*  $P \leq 0.01$ ; \*\*\*  $P \leq 0.001$ ;  
1059 bars indicate SD). (B) Heat map of DEGs between late fetal and P22  $\beta$ -cells. The Z-score scale  
1060 represents  $\log_2(X+1)$  transformed transcripts per million (TPM) counts. Red and blue color  
1061 intensity of the Z-score indicates up-regulation and down-regulation, respectively. (C,E) GO

1062 term analysis for biological processes with up-regulated (C) and down-regulated (E) genes  
1063 between late fetal and P22  $\beta$ -cells. Adjusted  $P$  value threshold was 0.1. (D,F) Boxplots  
1064 displaying normalized TPM (transcripts per million) counts of up-regulated (D) or down-  
1065 regulated (F) genes between late fetal and P22. Adjusted  $P$  value \*  $P \leq 0.05$ ; \*\*  $P \leq 0.01$ ; \*\*\*  
1066  $P \leq 0.001$ .



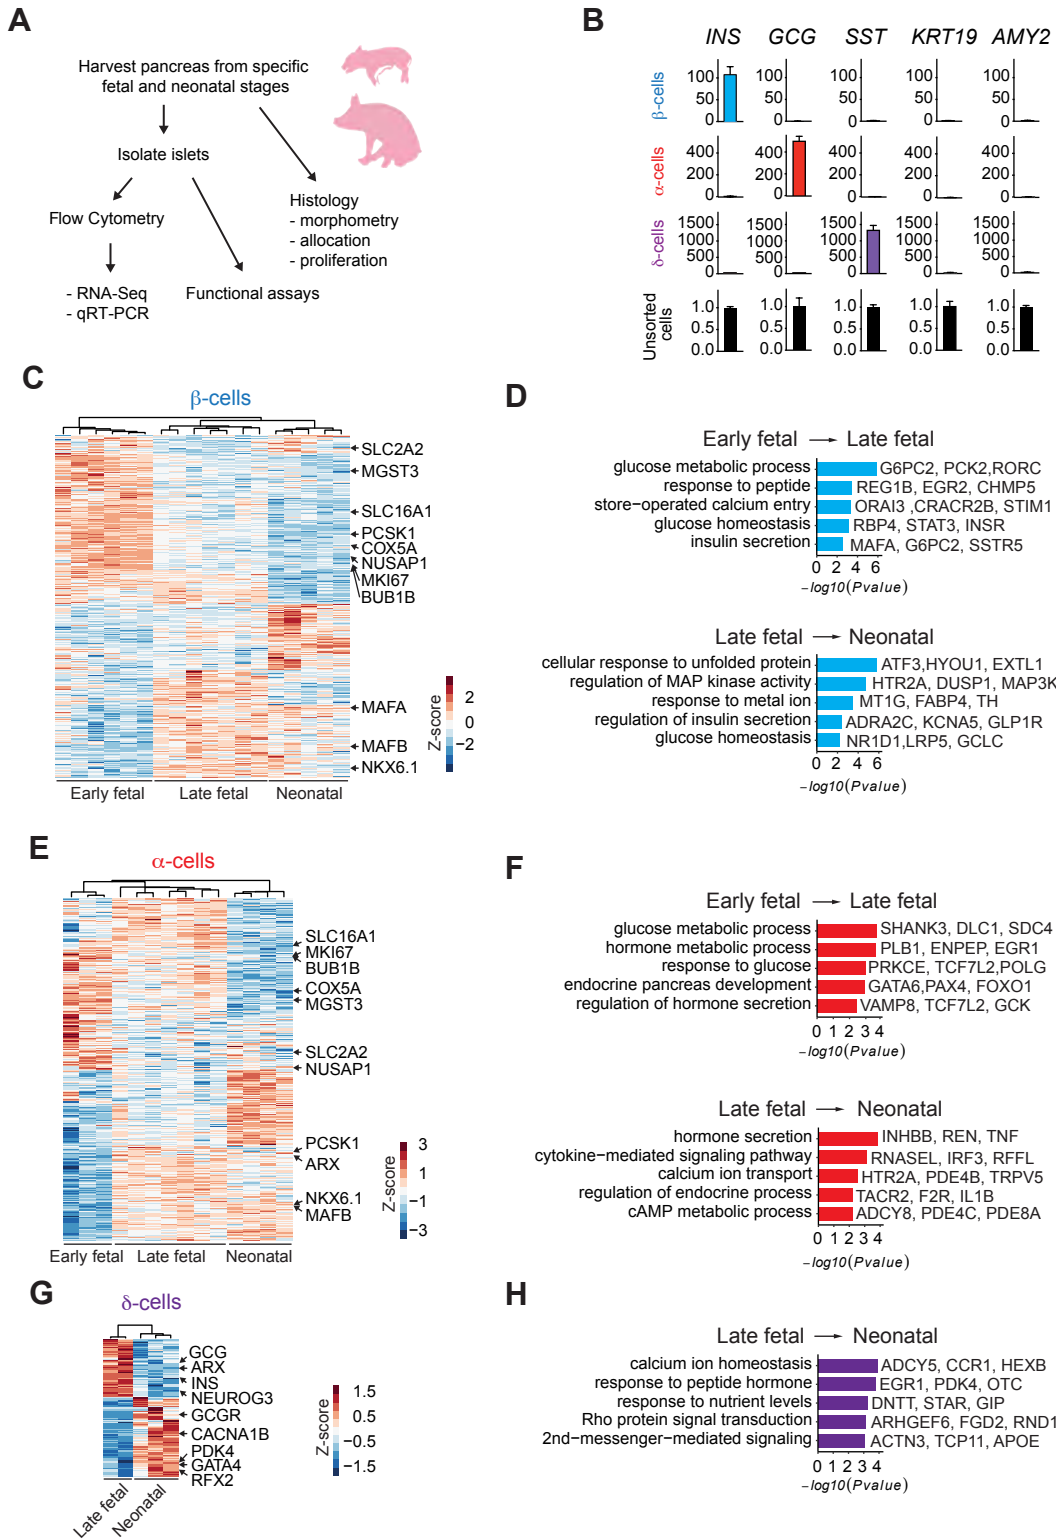

**Fig. 1**

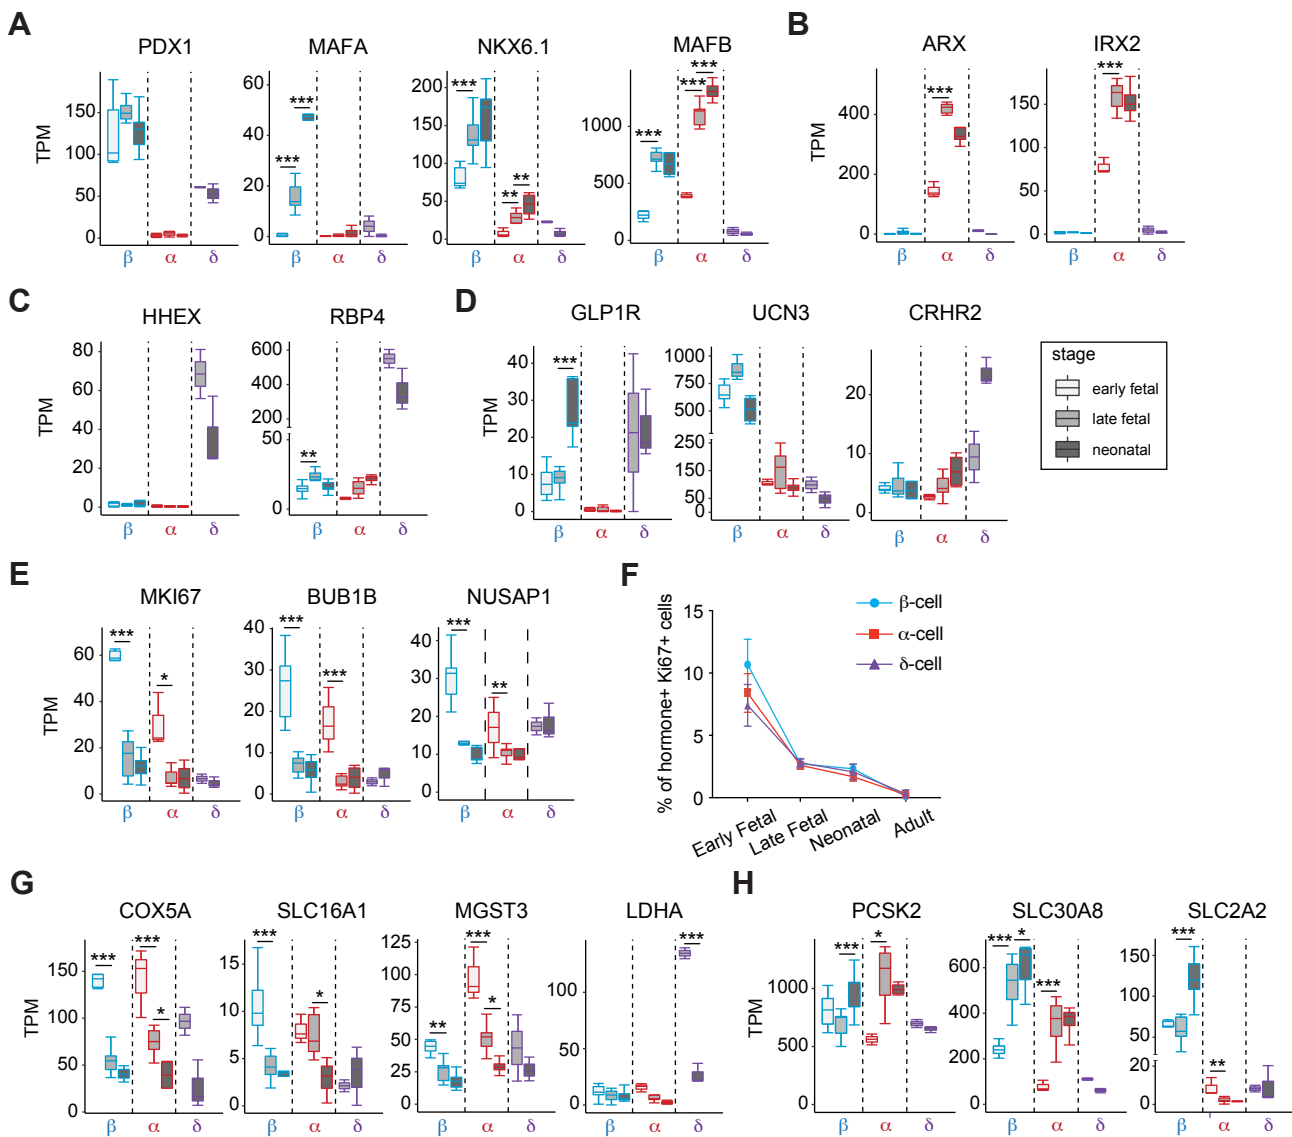

**Fig. 2**

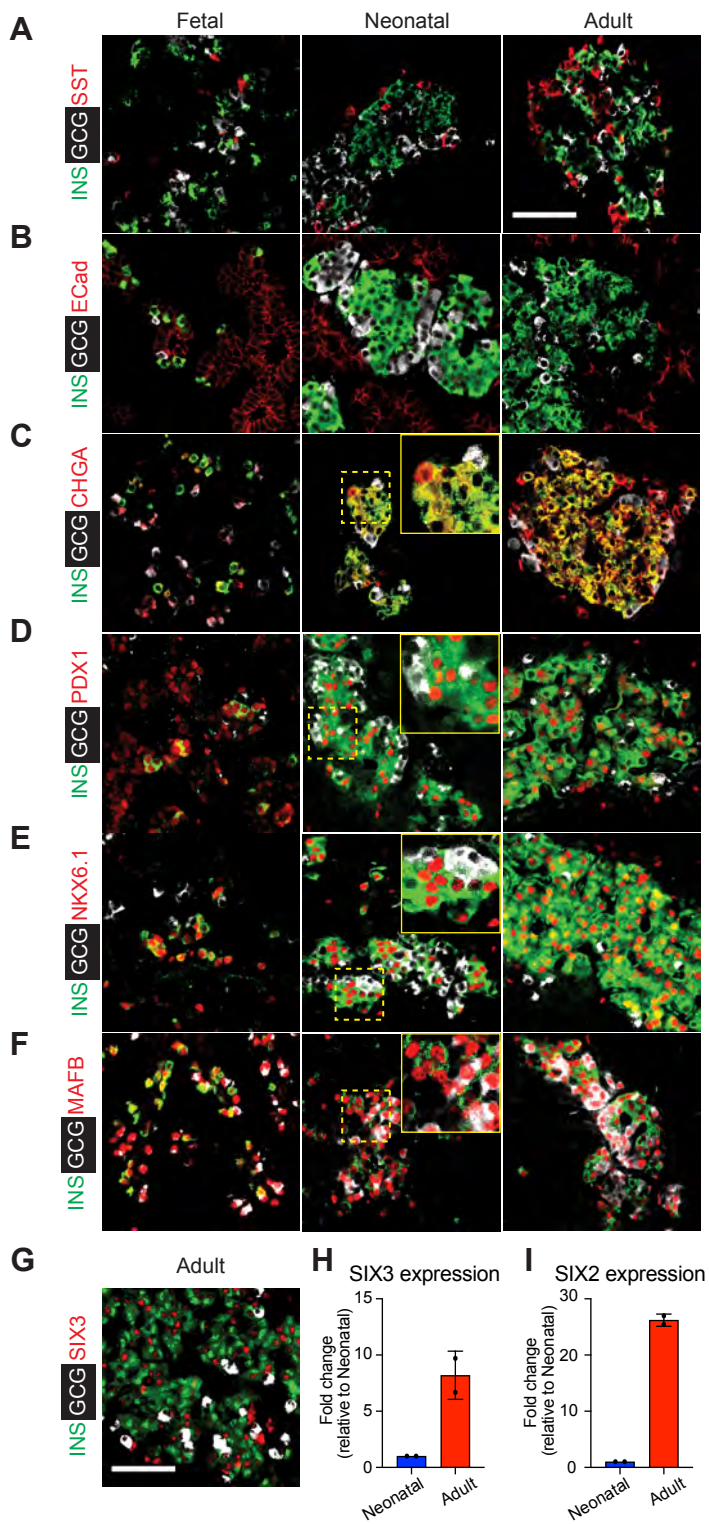

**Fig. 3**

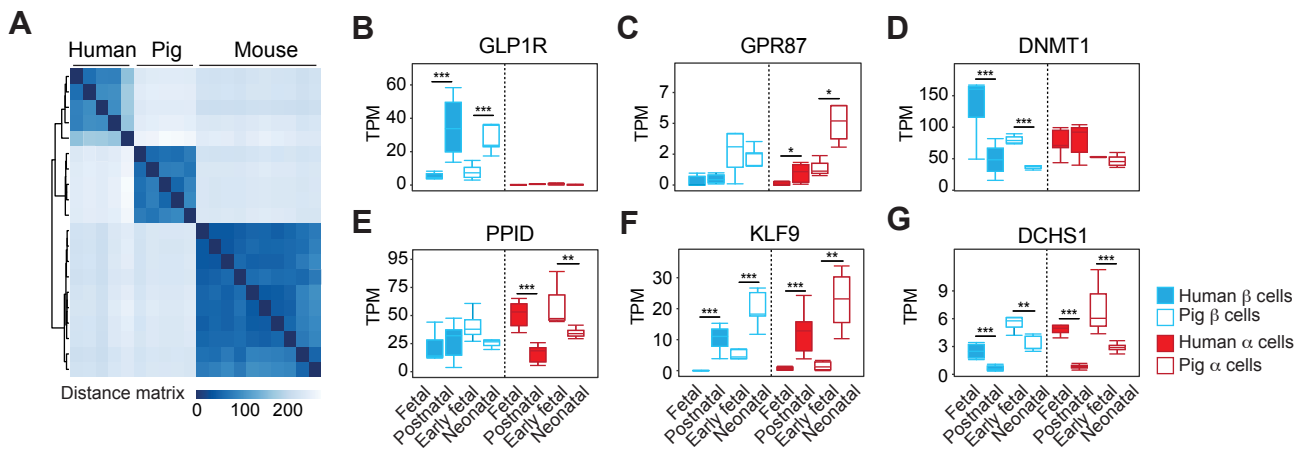

**Fig. 4**

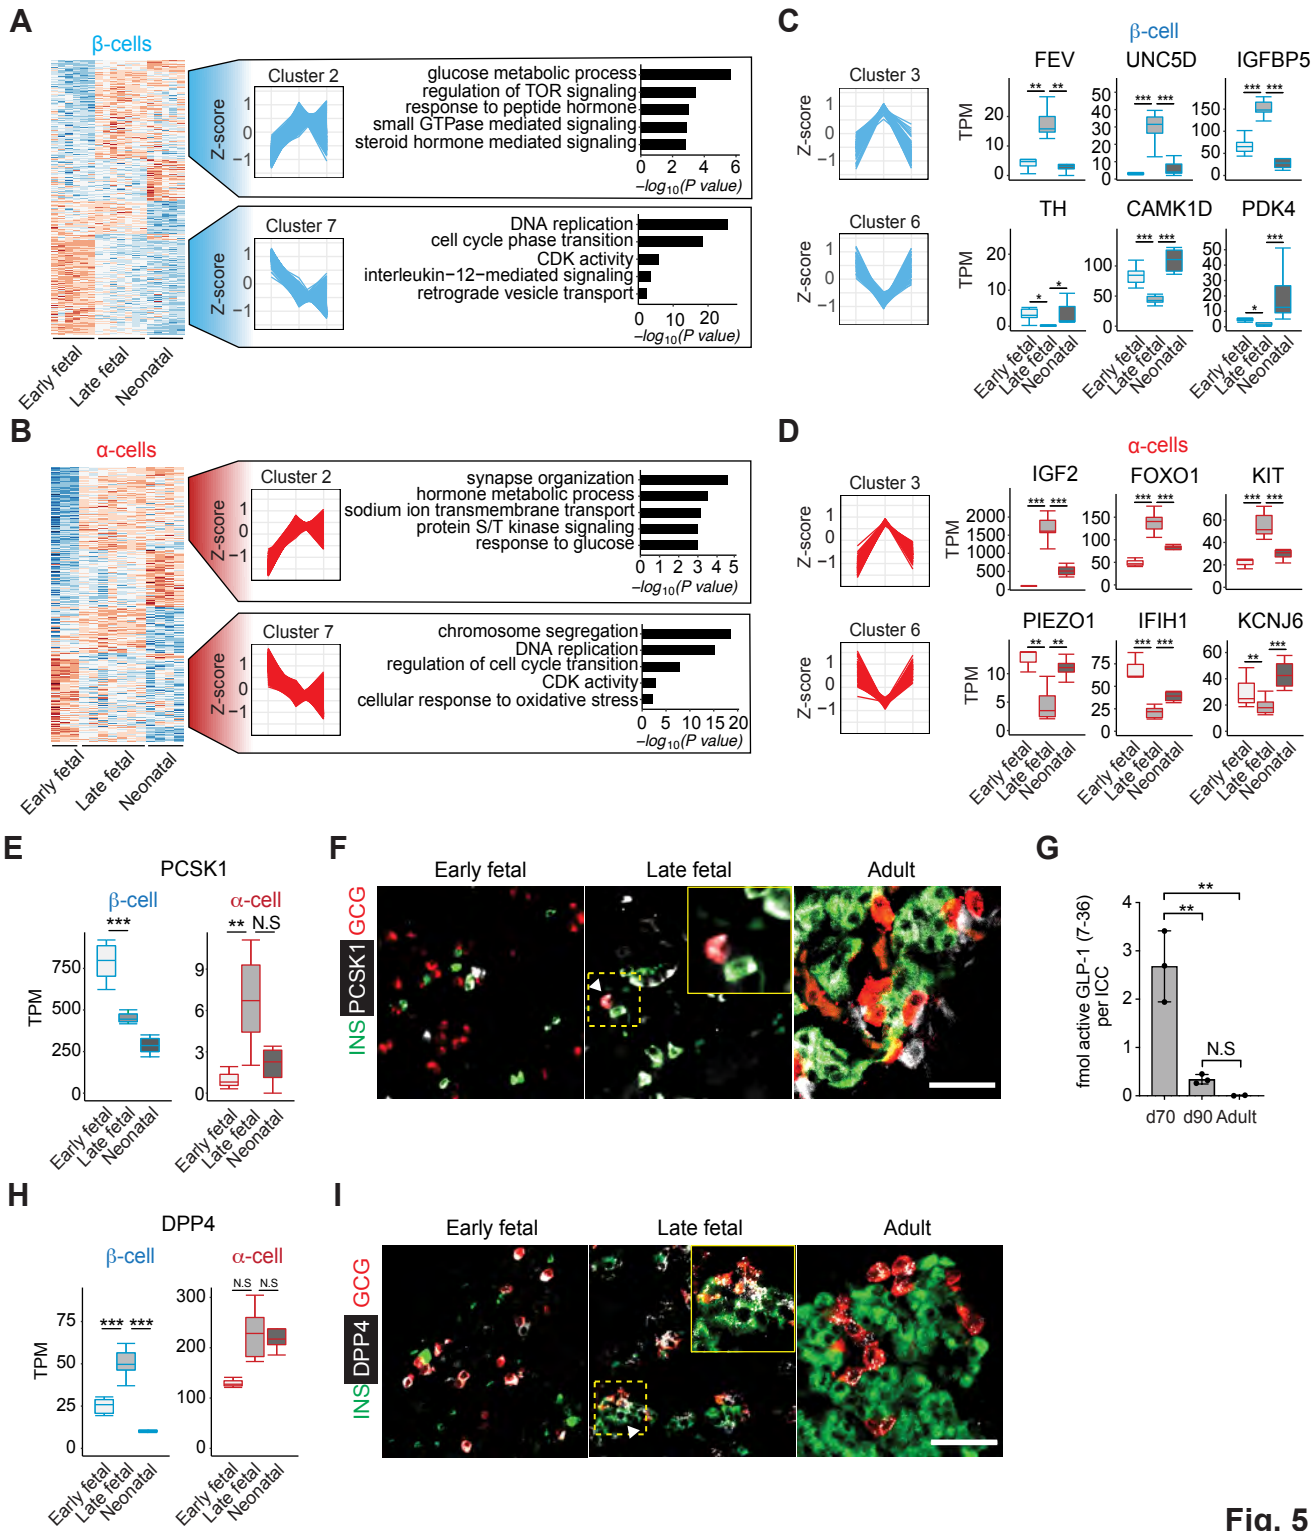

**Fig. 5**

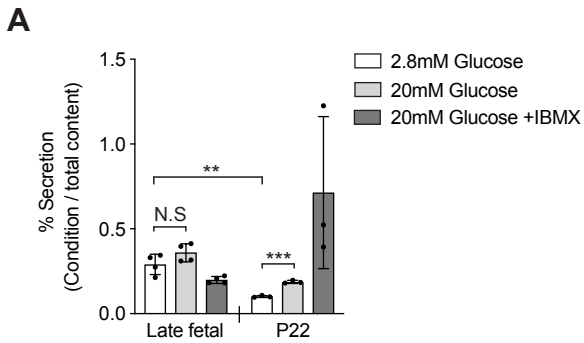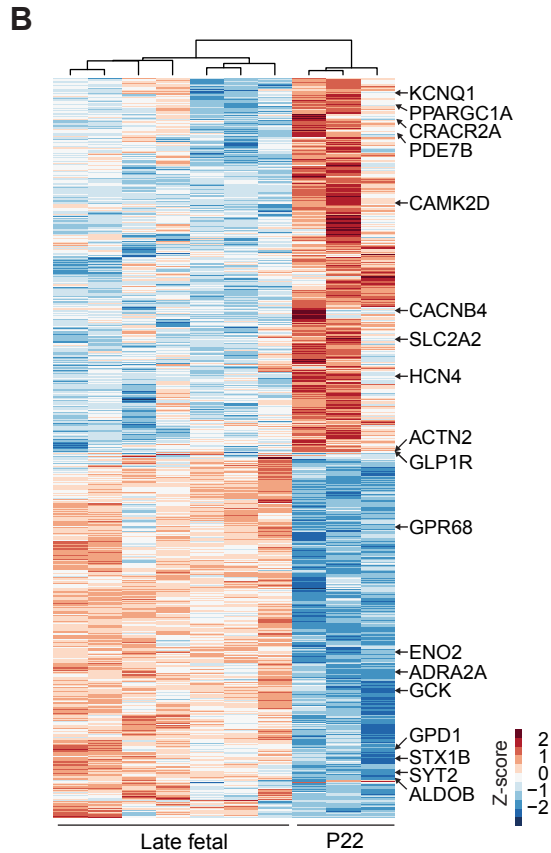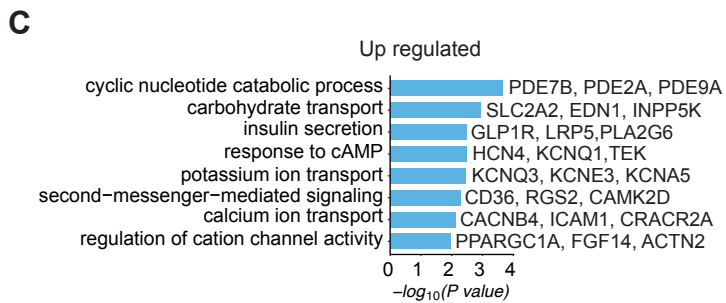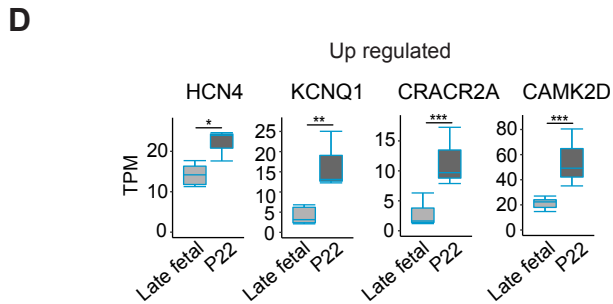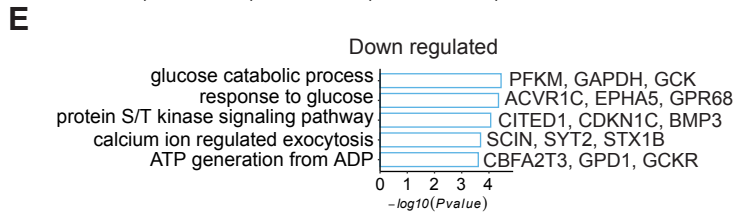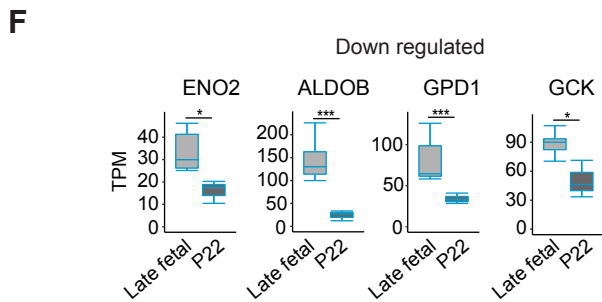

**Fig. 6**
